# Supplementary material for: Recent, Independent and Anthropogenic Origins of Trypanosoma cruzi Hybrids
Source: PubMed Central journal article supplement (PMC3191134; doi:10.1371/journal.pntd.0001363), 2011-10-11
Supplement: pntd.0001363.s001.pdf [file pntd.0001363.s001.pdf]

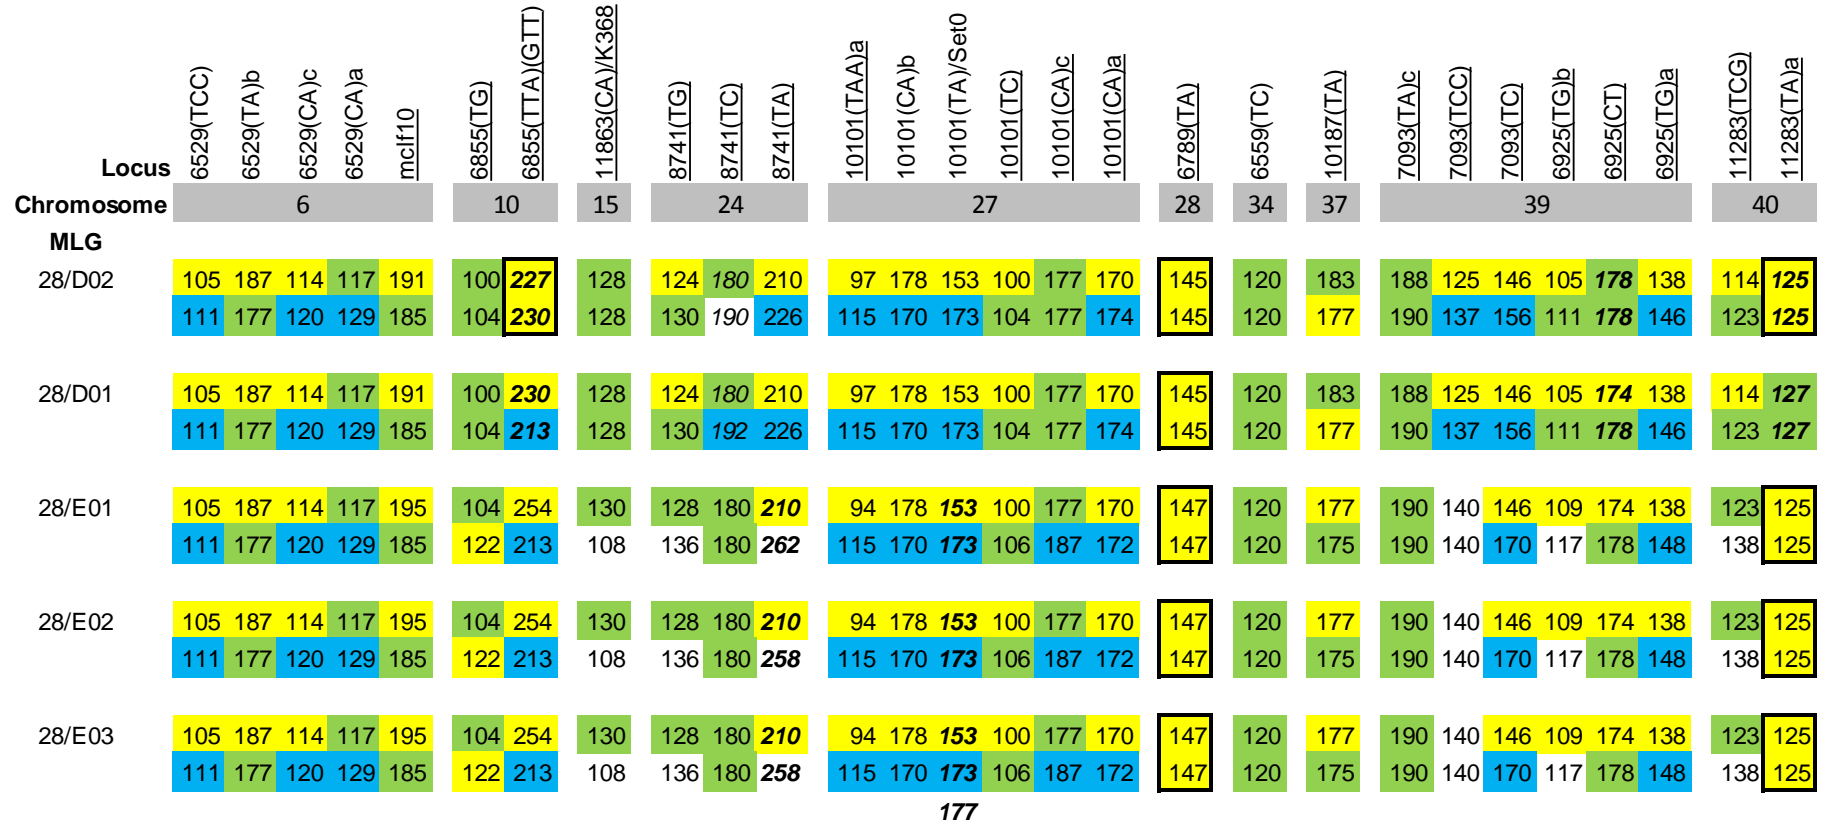

177

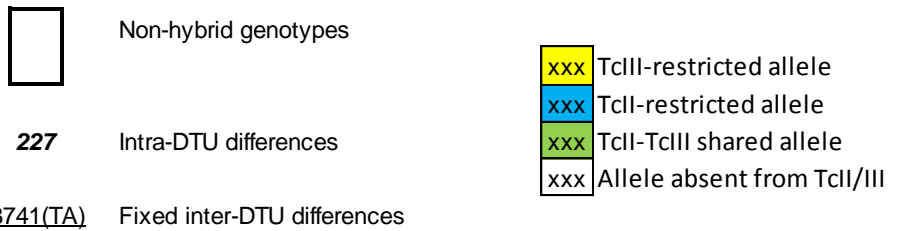

Supplementary Figure S1. Inferred patterns of allelic inheritance in hybrid multilocus genotypes
