# Supplementary material for: Recent, Independent and Anthropogenic Origins of Trypanosoma cruzi Hybrids
Source: PubMed Central journal article supplement (PMC3191134; doi:10.1371/journal.pntd.0001363), 2011-10-11
Supplement: pntd.0001363.s002.pdf [file pntd.0001363.s002.pdf]

**Table S1. Genotypes for all samples**

| Sample Set           | Strain       | DTU   | Location               | Host/Vector                | GPI               |           | Accession number(s)   |                       | COII-ND1          |                       | MLMT<br>(19 loci) | MLMT<br>(28 loci) |
|----------------------|--------------|-------|------------------------|----------------------------|-------------------|-----------|-----------------------|-----------------------|-------------------|-----------------------|-------------------|-------------------|
|                      |              |       |                        |                            | Haplotype code(s) |           |                       |                       | Haplotype<br>code | Accession<br>number   | MLG<br>code       | MLG<br>code       |
|                      |              |       |                        |                            | Allele 1          | Allele 2  | Allele 1              | Allele 2              |                   |                       |                   |                   |
| Core TcII,III, V, VI | Tu18 cl2     | TcII  | Tupiza, Bolivia        | <i>Triatoma infestans</i>  | Hap nG-21         | Hap nG-22 | HQ452700              | HQ452701              | Hap kCN-26        | AF359036 <sup>e</sup> | 19/B01            | 28/B01            |
|                      | Rita cl5     | TcII  | Bahia, Brazil          | <i>Homo sapiens</i>        | Hap nG-21         |           | HQ452702              |                       | Hap kCN-27        | HQ604863              | 19/B02            | 28/B02            |
|                      | CBB cl2      | TcII  | Region IV, Chile       | <i>Homo sapiens</i>        | Hap nG-21         | Hap nG-22 | HQ452703              | HQ452704              | Hap kCN-27        | HQ604864              | 19/B03            | 28/B03            |
|                      | Pot7a cl1    | TcII  | Boqueron, Paraguay     | <i>Triatoma infestans</i>  | Hap nG-21         |           | HQ452705              |                       | Hap kCN-27        | HQ604865              | 19/B04            | 28/B04            |
|                      | Pot7b cl5    | TcII  | Boqueron, Paraguay     | <i>Triatoma infestans</i>  | Hap nG-21         |           | HQ452706              |                       | Hap kCN-27        | HQ604866              | 19/B04            | 28/B04            |
|                      | IVV cl4      | TcII  | Cuncumen, Chile        | <i>Homo sapiens</i>        | Hap nG-21         | Hap nG-22 | HQ452707              | HQ452708              | Hap kCN-26        | HQ604867              | 19/B05            | 28/B05            |
|                      | Chaco23 col4 | TcII  | Pr. Hayes, Paraguay    | <i>Triatoma infestans</i>  | Hap nG-21         | Hap nG-22 | HQ452709              | HQ452710              | Hap kCN-25        | HQ604868              | 19/B06            | 28/B06            |
|                      | Esm cl3      | TcII  | Bahia, Brazil          | <i>Homo sapiens</i>        | Hap nG-21         |           | HQ452711              |                       | Hap kCN-27        | AF359035 <sup>e</sup> | 19/B04            | 28/B04            |
|                      | T665 cl1     | TcII  | Pr. Hayes, Paraguay    | <i>Triatoma infestans</i>  | Hap nG-22         |           | HQ452712              |                       | Hap kCN-28        | HQ604869              | 19/B07            | 28/B07            |
|                      | ARMA13 cl1   | TcIII | Boqueron, Paraguay     | <i>Dasyus novemcinctus</i> | Hap nG-14         |           | HQ452713              |                       | Hap kCN-15        | HQ604870              | 19/C01            | 28/C01            |
|                      | JA2 cl2      | TcIII | Amazonas, Brazil       | <i>Monodelphis sp.</i>     | Hap nG-15         |           | HQ452714              |                       | Hap kCN-14        | HQ604871              | 19/C02            | 28/C02            |
|                      | SABP19 cl1   | TcIII | Vitor, Peru            | <i>Triatoma infestans</i>  | Hap nG-16         | Hap nG-17 | HQ452715              | HQ452716              | Hap kCN-22        | HQ604872              | 19/C03            | 28/C03            |
|                      | ARMA18 cl3   | TcIII | Boqueron, Paraguay     | <i>Dasyus novemcinctus</i> | Hap nG-14         | Hap nG-18 | HQ452717              | HQ452718              | Hap kCN-13        | HQ604873              | 19/C04            | 28/C04            |
|                      | CM25 cl2     | TcIII | Carimaga, Colombia     | <i>Dasyprocta fuginosa</i> | Hap nG-15         | Hap nG-19 | GQ380671 <sup>a</sup> | GQ380672 <sup>a</sup> | Hap kCN-13        | HQ604874              | 19/C05            | 28/C05            |
|                      | M5631 cl5    | TcIII | Marajo, Para, Brazil   | <i>Dasyus novemcinctus</i> | Hap nG-15         | Hap nG-20 | GQ380676 <sup>a</sup> | GQ380677 <sup>a</sup> | Hap kCN-18        | HQ604875              | 19/C06            | 28/C06            |
|                      | M6241 cl6    | TcIII | Belém, Para, Brazil    | <i>Homo sapiens</i>        | Hap nG-15         | Hap nG-20 | HQ452719              | HQ452720              | Hap kCN-17        | AF359032 <sup>e</sup> | 19/C07            | 28/C07            |
|                      | 85/847 cl2   | TcIII | Alto Beni, Bolivia     | <i>Dasyus novemcinctus</i> | Hap nG-15         |           | GQ380661 <sup>a</sup> |                       | Hap kCN-11        | HQ604876              | 19/C08            | 28/C08            |
|                      | X9/3         | TcIII | Pr. Hayes, Paraguay    | <i>Canis familiaris</i>    | Hap nG-14         |           | HQ452721              |                       | Hap kCN-22        | AF359052 <sup>e</sup> | 19/C09            | 28/C09            |
|                      | X109/2       | TcIII | Pr. Hayes, Paraguay    | <i>Canis familiaris</i>    | Hap nG-16         |           | HQ452722              |                       | Hap kCN-22        | AF359053 <sup>e</sup> | 19/C10            | 28/C10            |
|                      | Sc43 cl1     | TcV   | Santa Cruz, Bolivia    | <i>Triatoma infestans</i>  | Hap nG-22         | Hap nG-23 | HQ452723              | HQ452724              | Hap kCN-19        | HQ604877              | 19/D01            | 28/D01            |
|                      | Para6 cl4    | TcV   | Paraguari, Paraguay    | <i>Triatoma infestans</i>  | Hap nG-22         | Hap nG-23 | HQ452725              | HQ452726              | Hap kCN-20        | HQ604878              | 19/D01            | 28/D01            |
|                      | 92-80 cl2    | TcV   | Santa Cruz, Bolivia    | <i>Homo sapiens</i>        | Hap nG-22         | Hap nG-23 | HQ452727              | HQ452728              | Hap kCN-21        | HQ604879              | 19/D01            | 28/D01            |
|                      | Para4 cl3    | TcV   | Paraguari, Paraguay    | <i>Triatoma infestans</i>  | Hap nG-22         | Hap nG-23 | HQ452729              | HQ452730              | Hap kCN-20        | HQ604880              | 19/D01            | 28/D01            |
|                      | Chaco2 cl3   | TcV   | Boqueron, Paraguay     | <i>Triatoma infestans</i>  | Hap nG-22         | Hap nG-23 | HQ452731              | HQ452732              | Hap kCN-20        | HQ604881              | 19/D01            | 28/D01            |
|                      | PAH179 cl5   | TcV   | Chaco, Argentina       | <i>Homo sapiens</i>        | Hap nG-22         | Hap nG-23 | HQ452733              | HQ452734              | Hap kCN-20        | HQ604882              | 19/D02            | 28/D02            |
|                      | Vinch101 cl1 | TcV   | Limari, Chile          | <i>Triatoma infestans</i>  | Hap nG-22         | Hap nG-23 | HQ452735              | HQ452736              | Hap kCN-20        | HQ604883              | 19/D01            | 28/D01            |
|                      | Bug2148 cl1  | TcV   | Rio Gr. do Sul, Brazil | <i>Triatoma infestans</i>  | Hap nG-22         | Hap nG-23 | HQ452737              | HQ452738              | Hap kCN-20        | HQ604884              | 19/D01            | 28/D01            |
|                      | CL Brener    | TcVI  | Rio Gr. do Sul, Brazil | <i>Triatoma infestans</i>  | Hap nG-22         | Hap nG-14 | HQ452739              | HQ452740              | Hap kCN-24        | AF359041 <sup>e</sup> | 19/E01            | 28/E01            |

|                          |               |      |                       |                              |           |           |          |          |            |                       |        |        |
|--------------------------|---------------|------|-----------------------|------------------------------|-----------|-----------|----------|----------|------------|-----------------------|--------|--------|
|                          | VFRA1 cl1     | TcVI | Francia, Chile        | <i>Triatoma infestans</i>    | Hap nG-22 | Hap nG-14 | HQ452741 | HQ452742 | Hap kCN-24 | HQ604885              | 19/E01 | 28/E01 |
|                          | Chaco17 col1  | TcVI | Pr. Hayes, Paraguay   | <i>Triatoma infestans</i>    | Hap nG-22 | Hap nG-14 | HQ452743 | HQ452744 | Hap kCN-24 | HQ604886              | 19/E01 | 28/E01 |
|                          | Tula cl2      | TcVI | Tulahuen, Chile       | <i>Homo sapiens</i>          | Hap nG-22 | Hap nG-14 | HQ452745 | HQ452746 | Hap kCN-24 | AF359042 <sup>e</sup> | 19/E02 | 28/E02 |
|                          | P251 cl7      | TcVI | Cochabamba, Bolivia   | <i>Homo sapiens</i>          | Hap nG-22 | Hap nG-14 | HQ452747 | HQ452748 | Hap kCN-24 | AF359048 <sup>e</sup> | 19/E03 | 28/E03 |
|                          | LHVA cl4      | TcVI | Chaco, Argentina      | <i>Triatoma infestans</i>    | Hap nG-22 | Hap nG-14 | HQ452749 | HQ452750 | Hap kCN-24 | HQ604887              | 19/E01 | 28/E01 |
|                          | EPV20-1 cl1   | TcVI | Chaco, Argentina      | <i>Triatoma infestans</i>    | Hap nG-22 | Hap nG-14 | HQ452751 | HQ452752 | Hap kCN-24 | HQ604888              | 19/E02 | 28/E02 |
|                          | Chaco9 col15  | TcVI | Pr. Hayes, Paraguay   | <i>Triatoma infestans</i>    | Hap nG-22 | Hap nG-14 | HQ452753 | HQ452754 | Hap kCN-23 | HQ604889              | 19/E01 | 28/E01 |
| <b>Suppl. TcI,III,IV</b> | SAXP18 cl1    | TcI  | Majes, Peru           | <i>Homo sapiens</i>          | Hap nG-1  |           | HQ452755 |          | Hap kCN-7  | HQ604890              | 19/X01 | ND     |
|                          | Chile C22 cl1 | TcI  | Flor de Valle, Chile  | <i>Triatoma spinolai</i>     | Hap nG-1  | Hap nG-3  | HQ452756 | HQ452757 | Hap kCN-6  | HQ604891              | 19/X02 | ND     |
|                          | 92101601P cl1 | TcI  | Georgia, USA          | <i>Didelphis marsupialis</i> | Hap nG-3  |           | HQ452758 |          | Hap kCN-8  | HQ604892              | 19/X03 | ND     |
|                          | JR cl4        | TcI  | Anzoátegui, Venezuela | <i>Homo sapiens</i>          | Hap nG-3  | Hap nG-5  | HQ452759 | HQ452760 | Hap kCN-4  | HQ604893              | 19/X04 | ND     |
|                          | CJ005 (PII)   | TcI  | Carajas, Brazil       | Unidentified Bug             | Hap nG-2  | Hap nG-4  | HQ452761 | HQ452762 | Hap kCN-1  | HQ604894              | 19/X05 | ND     |
|                          | CJ007 (PI)    | TcI  | Carajas, Brazil       | <i>Didelphis marsupialis</i> | Hap nG-6  | Hap nG-7  | HQ452763 | HQ452764 | Hap kCN-2  | HQ604895              | 19/X06 | ND     |
|                          | B187 cl10     | TcI  | Pará, Brazil          | <i>Didelphis marsupialis</i> | Hap nG-2  | Hap nG-8  | HQ452765 | HQ452766 | Hap kCN-3  | HQ604896              | ND     | ND     |
|                          | C8 cl1        | TcI  | La Paz, Bolivia       | <i>Triatoma infestans</i>    | Hap nG-1  | Hap nG-2  | HQ452767 | HQ452768 | Hap kCN-5  | HQ604897              | ND     | ND     |
|                          | X10/1         | TcI  | Pará, Brazil          | <i>Homo sapiens</i>          | Hap nG-3  | Hap nG-4  | HQ452769 | HQ452770 | Hap kCN-1  | AF359013 <sup>e</sup> | ND     | ND     |
|                          | FLORIDA       | TcI  | Florida, USA          | <i>Triatoma sanguisuga</i>   | Hap nG-3  |           | HQ452771 |          | Hap kCN-8  | AF359010 <sup>e</sup> | 19/X07 | ND     |
|                          | M7            | TcI  | Barinas, Venezuela    | <i>Didelphis marsupialis</i> | Hap nG-7  | Hap nG-6  | HQ452772 | HQ452773 | ND         |                       | 19/X08 | ND     |
|                          | Xe1313        | TcI  | Carajas, Brazil       | <i>Philander opossum</i>     | Hap nG-26 | Hap nG-27 | HQ452774 | HQ452775 | ND         |                       | 19/X09 | ND     |
|                          | Xe3981        | TcI  | Para, Brazil          | <i>Didelphis marsupialis</i> | Hap nG-28 | Hap nG-29 | HQ452776 | HQ452777 | ND         |                       | 19/X10 | ND     |
|                          | Sjm34         | TcI  | Beni, Bolivia         | <i>Didelphis marsupialis</i> | Hap nG-2  | Hap nG-29 | HQ452778 | HQ452779 | ND         |                       | 19/X11 | ND     |
|                          | Xe5012        | TcI  | Para, Brazil          | <i>Didelphis marsupialis</i> | Hap nG-29 | Hap nG-2  | HQ452780 | HQ452781 | ND         |                       | 19/X12 | ND     |
|                          | COTMA9        | TcI  | Cotopachi, Bolivia    | <i>Phyllotis ocilae</i>      | Hap nG-30 | Hap nG-1  | HQ452782 | HQ452783 | ND         |                       | 19/X13 | ND     |
|                          | PALDA22       | TcI  | Chaco, Argentina      | <i>Didelphis albiventris</i> | Hap nG-30 | Hap nG-34 | HQ452784 | HQ452785 | ND         |                       | 19/X14 | ND     |
|                          | COTMA55       | TcI  | Cotopachi, Bolivia    | <i>Phyllotis ocilae</i>      | Hap nG-30 | Hap nG-1  | HQ452786 | HQ452787 | ND         |                       | 19/X15 | ND     |
|                          | 458           | TcI  | Bajo Calima, Colombia | <i>Potus flavus</i>          | Hap nG-31 | Hap nG-32 | HQ452788 | HQ452789 | ND         |                       | 19/X16 | ND     |
|                          | PALDA3        | TcI  | Chaco, Argentina      | <i>Didelphis albiventris</i> | Hap nG-2  |           | HQ452790 |          | ND         |                       | 19/X17 | ND     |
|                          | TEDA          | TcI  | Chaco, Argentina      | <i>Didelphis albiventris</i> | Hap nG-2  | Hap nG-34 | HQ452791 | HQ452792 | ND         |                       | 19/X18 | ND     |
|                          | 361ta         | TcI  | Guadual, Colombia     | <i>Didelphis marsupialis</i> | Hap nG-3  |           | HQ452793 |          | ND         |                       | 19/X19 | ND     |
|                          | M13           | TcI  | Barinas, Venezuela    | <i>Didelphis marsupialis</i> | Hap nG-3  |           | HQ452794 |          | ND         |                       | 19/X20 | ND     |
|                          | M18           | TcI  | Barinas, Venezuela    | <i>Didelphis marsupialis</i> | Hap nG-3  |           | HQ452795 |          | ND         |                       | 19/X21 | ND     |
|                          | 93070103P     | TcI  | Georgia. USA          | <i>Didelphis marsupialis</i> | Hap nG-3  |           | HQ452796 |          | Hap kCN-8  | HQ604898              | 19/X07 | ND     |
|                          | PALDA5        | TcI  | Chaco, Argentina      | <i>Didelphis albiventris</i> | Hap nG-3  | Hap nG-34 | HQ452797 | HQ452798 | ND         |                       | 19/X23 | ND     |

|                                       |       |                       |                                                      |           |           |                       |                       |            |                       |        |    |
|---------------------------------------|-------|-----------------------|------------------------------------------------------|-----------|-----------|-----------------------|-----------------------|------------|-----------------------|--------|----|
| Sjm32                                 | Tcl   | Beni, Bolivia         | <i>Philander opossum</i>                             | Hap nG-3  |           | HQ452799              |                       | ND         |                       | 19/X24 | ND |
| Sjmc7                                 | Tcl   | Beni, Bolivia         | <i>Scuireus spadiceus</i>                            | Hap nG-33 | Hap nG-3  | HQ452800              | HQ452801              | ND         |                       | 19/X25 | ND |
| Xe5165                                | Tcl   | Para, Brazil          | <i>Didelphis marsupialis</i>                         | Hap nG-3  |           | HQ452802              |                       | ND         |                       | 19/X26 | ND |
| USA Arma cl1                          | Tcl   | Louisiana, USA        | <i>Dasypus novemcinctus</i>                          | ND        | ND        |                       |                       | Hap kCN-39 | HQ604899              | 19/X22 | ND |
| USA Opossum cl2                       | Tcl   | Louisiana, USA        | <i>Didelphis marsupialis</i>                         | ND        | ND        |                       |                       | Hap kCN-39 | HQ604900              | 19/X27 | ND |
| CM17                                  | TcIII | Carimaga, Colombia    | <i>Dasypus spp</i>                                   | Hap nG-15 |           | HQ452803              |                       | Hap kCN-16 | AF359033 <sup>e</sup> | 19/C11 | ND |
| m10                                   | TcIII | Barinas, Venezuela    | <i>Dasypus novemcinctus</i>                          | Hap nG-24 | Hap nG-15 | GQ380673 <sup>a</sup> | GQ380674 <sup>a</sup> | ND         |                       | 19/C12 | ND |
| cayma19                               | TcIII | Santa Cruz, Bolivia   | <i>Dasypus novemcinctus</i><br><i>Chaetophractus</i> | Hap nG-15 |           | GQ380667 <sup>a</sup> |                       | ND         |                       | 19/C13 | ND |
| Ma194                                 | TcIII | Boqueron, Paraguay    | <i>vellorosos</i>                                    | Hap nG-14 |           | GQ380683 <sup>a</sup> |                       | ND         |                       | 19/C14 | ND |
| Sp4                                   | TcIII | San Pedro, Paraguay   | <i>Monodelphis domestica</i>                         | Hap nG-14 |           | GQ380688 <sup>a</sup> |                       | Hap kCN-22 | HQ604901              | 19/C15 | ND |
| Sjmc4                                 | TcIII | Beni, Bolivia         | <i>Dasypus novemcinctus</i>                          | Hap nG-15 |           | GQ380663 <sup>a</sup> |                       | Hap kCN-31 | HQ604902              | 19/C16 | ND |
| Sjmc10                                | TcIII | Beni, Bolivia         | <i>Dasypus novemcinctus</i>                          | Hap nG-15 |           | GQ380662 <sup>a</sup> |                       | Hap kCN-31 | HQ604903              | 19/C17 | ND |
| Sam6                                  | TcIII | Santa Cruz, Bolivia   | <i>Dasypus novemcinctus</i>                          | Hap nG-18 | Hap nG-14 | GQ380669 <sup>a</sup> | GQ380670 <sup>a</sup> | Hap kCN-31 | HQ604904              | 19/C18 | ND |
| Cayma14                               | TcIII | Santa Cruz, Bolivia   | <i>Dasypus novemcinctus</i>                          | Hap nG-25 | Hap nG-14 | GQ380664 <sup>a</sup> | GQ380665 <sup>a</sup> | Hap kCN-31 | HQ604905              | 19/C19 | ND |
| Arma12                                | TcIII | Boqueron, Paraguay    | <i>Dasypus novemcinctus</i>                          | Hap nG-14 |           | GQ380680 <sup>a</sup> |                       | ND         |                       | 19/C20 | ND |
| Arma9                                 | TcIII | Boqueron, Paraguay    | <i>Dasypus novemcinctus</i>                          | Hap nG-14 |           | GQ380682 <sup>a</sup> |                       | ND         |                       | 19/C21 | ND |
| Cayma18                               | TcIII | Santa Cruz, Bolivia   | <i>Dasypus novemcinctus</i>                          | Hap nG-14 |           | GQ380666 <sup>a</sup> |                       | ND         |                       | 19/C22 | ND |
| Sp13                                  | TcIII | San Pedro, Paraguay   | <i>Dasypus novemcinctus</i>                          | Hap nG-14 |           | GQ380685 <sup>a</sup> |                       | ND         |                       | 19/C23 | ND |
| Sp15                                  | TcIII | San Pedro, Paraguay   | <i>Dasypus novemcinctus</i>                          | Hap nG-14 |           | GQ380686 <sup>a</sup> |                       | ND         |                       | 19/C24 | ND |
| Sp16                                  | TcIII | San Pedro, Paraguay   | <i>Dasypus novemcinctus</i>                          | Hap nG-14 |           | GQ380687 <sup>a</sup> |                       | Hap kCN-22 | HQ604906              | 19/C23 | ND |
| CanIII cl1                            | TcIV  | Belém, Brazil         | <i>Homo sapiens</i>                                  | Hap nG-9  |           | HQ452804              |                       | Hap kCN-12 | AF359030 <sup>e</sup> | 19/A01 | ND |
| 10R26                                 | TcIV  | Santa Cruz, Bolivia   | <i>Aotus sp.</i>                                     | Hap nG-10 |           | HQ452805              |                       | Hap kCN-16 | HQ604907              | 19/A02 | ND |
| ERA cl2                               | TcIV  | Anzoátegui, Venezuela | <i>Homo sapiens</i>                                  | Hap nG-10 |           | HQ452806              |                       | Hap kCN-16 | HQ604908              | 19/A03 | ND |
| 92122102R                             | TcIV  | Georgia, USA          | <i>Procyon lotor</i>                                 | Hap nG-11 |           | HQ452807              |                       | Hap kCN-10 | HQ604909              | ND     | ND |
| StC10R cl1                            | TcIV  | Georgia, USA          | <i>Procyon lotor</i>                                 | Hap nG-11 |           | HQ452808              |                       | Hap kCN-9  | HQ604910              | ND     | ND |
| Saimiri3 cl1                          | TcIV  | Venezuela             | <i>Saimiri sciureus</i>                              | Hap nG-12 | Hap nG-13 | HQ452809              | HQ452810              | Hap kCN-18 | HQ604911              | ND     | ND |
| X10610 cl5                            | TcIV  | Guárico, Venezuela    | <i>Homo sapiens</i>                                  | Hap nG-10 |           | HQ452811              |                       | Hap kCN-16 | HQ604912              | ND     | ND |
| <b>Outgroups</b>                      |       |                       |                                                      |           |           |                       |                       |            |                       |        |    |
| <i>T. cruzi marinkellei</i><br>B7     | NA    | Bahia, Brazil         | <i>Phyllostomus discolor</i>                         | ND        |           | ND                    |                       | Tcm B7cl11 | AF359055 <sup>e</sup> | ND     | ND |
| <i>T. cruzi marinkellei</i><br>593/B3 | NA    | Bahia, Brazil         | <i>Phyllostomus discolor</i>                         | Tcm B3    |           | AY484484 <sup>b</sup> |                       | Tcm 593-B3 | AF359054 <sup>e</sup> | ND     | ND |
| <i>T. cruzi marinkellei</i><br>M1909  | NA    | Caracas, Venezuela    | <i>Phyllostomus discolor</i>                         | Tcm M1909 |           | HQ452812              |                       | ND         |                       | ND     | ND |
| <i>T. rangeli</i> RGB                 | NA    | Caracas, Venezuela    | <i>Canis familiaris</i>                              | Tr RGB    |           | AY484486 <sup>b</sup> |                       | ND         |                       | ND     | ND |
| <i>T. brucei</i> TREU927              | NA    | Kenya                 | <i>Glossina palpalis</i>                             | Tb 927    |           | AL929603 <sup>c</sup> |                       | ND         |                       | ND     | ND |

|                         | <i>T. brucei</i> 427 | NA   | Uganda                  | <i>Ovis aires</i>            | Tb 427 | X15540 <sup>d</sup> | ND         | ND                    | ND |    |
|-------------------------|----------------------|------|-------------------------|------------------------------|--------|---------------------|------------|-----------------------|----|----|
| <b>Genbank COII-ND1</b> | MAV                  | Tcl  | Venezuela               | <i>Homo sapiens</i>          | ND     | ND                  | Hap kCN-1  | AF359016 <sup>e</sup> | ND | ND |
|                         | X10/4                | Tcl  | Belém, Brazil           | <i>Homo sapiens</i>          | ND     | ND                  | Hap kCN-1  | EU302222 <sup>f</sup> | ND | ND |
|                         | CUTIA                | Tcl  | Espirito Santo, Brazil  | <i>Dasyprocta sp</i>         | ND     | ND                  | Hap kCN-6  | AF359021 <sup>e</sup> | ND | ND |
|                         | V121                 | Tcl  | Region II, Chile        | <i>Triatoma infestans</i>    | ND     | ND                  | Hap kCN-6  | AF359018 <sup>e</sup> | ND | ND |
|                         | P209                 | Tcl  | Sucre, Bolivia          | <i>Homo sapiens</i>          | ND     | ND                  | Hap kCN-6  | AF359023 <sup>e</sup> | ND | ND |
|                         | CEPA_EP              | Tcl  | Unknown                 | Unknown                      | ND     | ND                  | Hap kCN-33 | AF359011 <sup>e</sup> | ND | ND |
|                         | Teh                  | Tcl  | Mexico<br>Cundinamarca, | Unidentified bug             | ND     | ND                  | Hap kCN-33 | AF359009 <sup>e</sup> | ND | ND |
|                         | VinC6                | Tcl  | Colombia                | <i>Didelphis marsupialis</i> | ND     | ND                  | Hap kCN-33 | AF359012 <sup>e</sup> | ND | ND |
|                         | OPS21                | Tcl  | Cojedes, Venezuela      | <i>Homo sapiens</i>          | ND     | ND                  | Hap kCN-33 | AF359020 <sup>e</sup> | ND | ND |
|                         | 171                  | Tcl  | Guatemala               | <i>Triatoma dimidiata</i>    | ND     | ND                  | Hap kCN-33 | EU302205 <sup>f</sup> | ND | ND |
|                         | H15                  | Tcl  | Guatemala               | <i>Homo sapiens</i>          | ND     | ND                  | Hap kCN-33 | EU302206 <sup>f</sup> | ND | ND |
|                         | SJA-3                | Tcl  | Guatemala               | <i>Triatoma dimidiata</i>    | ND     | ND                  | Hap kCN-33 | EU302207 <sup>f</sup> | ND | ND |
|                         | SJA-8                | Tcl  | Guatemala               | <i>Triatoma dimidiata</i>    | ND     | ND                  | Hap kCN-33 | EU302208 <sup>f</sup> | ND | ND |
|                         | St5                  | Tcl  | Guatemala               | <i>Triatoma dimidiata</i>    | ND     | ND                  | Hap kCN-33 | EU302209 <sup>f</sup> | ND | ND |
|                         | Colombia             | Tcl  | Colombia                | <i>Homo sapiens</i>          | ND     | ND                  | Hap kCN-33 | EU302213 <sup>f</sup> | ND | ND |
|                         | T-P                  | Tcl  | Peru                    | <i>Triatoma infestans</i>    | ND     | ND                  | Hap kCN-34 | EU302215 <sup>f</sup> | ND | ND |
|                         | ACP-P                | Tcl  | Peru                    | <i>Homo sapiens</i>          | ND     | ND                  | Hap kCN-34 | EU302214 <sup>f</sup> | ND | ND |
|                         | Esquilo              | Tcl  | São Paulo, Brazil       | <i>Sciurus aestuans</i>      | ND     | ND                  | Hap kCN-34 | AF359028 <sup>e</sup> | ND | ND |
|                         | P0AC                 | Tcl  | Bolivia                 | <i>Homo sapiens</i>          | ND     | ND                  | Hap kCN-34 | AF359027 <sup>e</sup> | ND | ND |
|                         | SO34 cl4             | Tcl  | Potosi, Bolivia         | <i>Triatoma infestans</i>    | ND     | ND                  | Hap kCN-34 | AF359025 <sup>e</sup> | ND | ND |
|                         | CUICA cl1            | Tcl  | São Paulo, Brazil       | <i>Philander opossum</i>     | ND     | ND                  | Hap kCN-34 | AF359024 <sup>e</sup> | ND | ND |
|                         | SABP3                | Tcl  | Vitor, Peru             | <i>Triatoma infestans</i>    | ND     | ND                  | Hap kCN-34 | AF359017 <sup>e</sup> | ND | ND |
|                         | SC13                 | Tcl  | Unknown                 | Unknown                      | ND     | ND                  | Hap kCN-35 | AF359029 <sup>e</sup> | ND | ND |
|                         | A80                  | Tcl  | Montsinery, Fr. Guyana  | <i>Didelphis marsupialis</i> | ND     | ND                  | Hap kCN-36 | AF359014 <sup>e</sup> | ND | ND |
|                         | A92                  | Tcl  | Acarouany, Fr. Guyana   | <i>Didelphis marsupialis</i> | ND     | ND                  | Hap kCN-36 | AF359015 <sup>e</sup> | ND | ND |
|                         | 85/818               | Tcl  | Alto Beni, Bolivia      | <i>Didelphis marsupialis</i> | ND     | ND                  | Hap kCN-37 | AF359026 <sup>e</sup> | ND | ND |
|                         | Ab3-4                | Tcl  | Bolivia                 | <i>Triatoma infestans</i>    | ND     | ND                  | Hap kCN-38 | EU302216 <sup>f</sup> | ND | ND |
|                         | 26 79                | Tcl  | Santa Cruz, Bolivia     | <i>Triatoma sordida</i>      | ND     | ND                  | Hap kCN-38 | AF359019 <sup>e</sup> | ND | ND |
|                         | 133 79               | Tcl  | Santa Cruz, Bolivia     | <i>Homo sapiens</i>          | ND     | ND                  | Hap kCN-38 | AF359022 <sup>e</sup> | ND | ND |
|                         | MVB                  | TclI | Region IV, Chile        | <i>Homo sapiens</i>          | ND     | ND                  | Hap kCN-26 | AF359051 <sup>e</sup> | ND | ND |
|                         | X-300                | TclI | Paraiba, Brazil         | <i>Homo sapiens</i>          | ND     | ND                  | Hap kCN-27 | AF359049 <sup>e</sup> | ND | ND |
|                         | MSC2                 | TclI | Brasília, Brazil        | <i>Homo sapiens</i>          | ND     | ND                  | Hap kCN-27 | AF359038 <sup>e</sup> | ND | ND |

|         |       |                     |                              |    |    |            |                       |    |    |
|---------|-------|---------------------|------------------------------|----|----|------------|-----------------------|----|----|
| MCV     | TcII  | Region IV, Chile    | <i>Homo sapiens</i>          | ND | ND | Hap kCN-30 | AF359050 <sup>e</sup> | ND | ND |
| X110/8  | TcIII | Pr. Hayes, Paraguay | <i>Canis familiaris</i>      | ND | ND | Hap kCN-22 | AF359034 <sup>e</sup> | ND | ND |
| Ep255   | TcIV  | Meta, Colombia      | <i>Rhodnius prolixus</i>     | ND | ND | Hap kCN-29 | AF359031 <sup>e</sup> | ND | ND |
| BRJ     | TcIV  | Guatemala           | <i>Homo sapiens</i>          | ND | ND | Hap kCN-16 | EU302217 <sup>f</sup> | ND | ND |
| SO3 cl5 | TcV   | Potosi, Bolivia     | <i>Triatoma infestans</i>    | ND | ND | Hap kCN-20 | AF359039 <sup>e</sup> | ND | ND |
| 86-1    | TcV   | Santa Cruz, Bolivia | Unknown                      | ND | ND | Hap kCN-20 | AF359043 <sup>e</sup> | ND | ND |
| Ab3-10  | TcV   | Bolivia             | <i>Triatoma infestans</i>    | ND | ND | Hap kCN-20 | EU302218 <sup>f</sup> | ND | ND |
| EPP     | TcV   | Region I, Chile     | <i>Homo sapiens</i>          | ND | ND | Hap kCN-32 | AF359044 <sup>e</sup> | ND | ND |
| 86/2036 | TcVI  | Bolivia             | <i>Didelphis marsupialis</i> | ND | ND | Hap kCN-24 | AF359047 <sup>e</sup> | ND | ND |
| VMV4    | TcVI  | Unknown             | Unknown                      | ND | ND | Hap kCN-24 | AF359045 <sup>e</sup> | ND | ND |
| P63 cl1 | TcVI  | Pr. Hayes, Paraguay | <i>Triatoma infestans</i>    | ND | ND | Hap kCN-24 | AF359046 <sup>e</sup> | ND | ND |

DTU, discrete typing unit; MLMT, multilocus microsatellite typing; MLG, multilocus genotype; Hap, haplotype; ND, not determined

<sup>a</sup>, [1]; <sup>b</sup>, [2]; <sup>c</sup>, [3]; <sup>d</sup>, [4]; <sup>e</sup>, [5]; <sup>f</sup>, [6].

1. Llewellyn MS, Lewis MD, Acosta N, Yeo M, Carrasco HJ, et al. (2009) *Trypanosoma cruzi* IIc: Phylogenetic and Phylogeographic Insights from Sequence and Microsatellite Analysis and Potential Impact on Emergent Chagas Disease. *PLoS Negl Trop Dis* 3: e510.
2. Broutin H, Tarrieu F, Tibayrenc M, Oury B, Barnabé C (2006) Phylogenetic analysis of the glucose-6-phosphate isomerase gene in *Trypanosoma cruzi*. *Exp Parasitol* 113: 1-7.
3. Hall N, Berriman M, Lennard NJ, Harris BR, Hertz-Fowler C, et al. (2003) The DNA sequence of chromosome I of an African trypanosome: gene content, chromosome organisation, recombination and polymorphism. *Nucleic Acids Res* 31: 4864-4873.
4. Marchand M, Kooystra U, Wierenga RK, Lambeir A-M, Van Beeumen J, et al. (1989) Glucosephosphate isomerase from *Trypanosoma brucei*. *Eur J Biochem* 184: 455-464.
5. Machado CA, Ayala FJ (2001) Nucleotide sequences provide evidence of genetic exchange among distantly related lineages of *Trypanosoma cruzi*. *Proc Natl Acad Sci USA* 98: 7396-7401.
6. Iwagami M, Higo H, Miura S, Yanagi T, Tada I, et al. (2007) Molecular phylogeny of *Trypanosoma cruzi* from Central America (Guatemala) and a comparison with South American strains. *Parasitol Res* 102: 129-134.
