# Supplementary material for: Recent, Independent and Anthropogenic Origins of Trypanosoma cruzi Hybrids
Source: PubMed Central journal article supplement (PMC3191134; doi:10.1371/journal.pntd.0001363), 2011-10-11
Supplement: pntd.0001363.s004.pdf [file pntd.0001363.s004.pdf]

**Table S4. Sequence diversity summary statistics**

| Locus           | Group           | N <sup>a</sup>   | L <sup>b</sup> | S <sup>c</sup> | k <sup>d</sup> | h <sup>e</sup> | Hd <sup>f</sup> | Hd SD | $\pi$ <sup>g</sup> | $\pi$ SD |        |
|-----------------|-----------------|------------------|----------------|----------------|----------------|----------------|-----------------|-------|--------------------|----------|--------|
| <i>GPI</i>      | <i>T. cruzi</i> | 172              |                | 1038           | 58             | 10.502         | 34              | 0.918 | 0.009              | 0.0101   | 0.0005 |
|                 | TcI             | 58               |                | 1038           | 13             | 1.969          | 17              | 0.840 | 0.039              | 0.0019   | 0.0002 |
|                 | TcII            | 18               |                | 1038           | 1              | 0.471          | 2               | 0.471 | 0.082              | 0.0005   | 0.0001 |
|                 | TcIII           | 50               |                | 1038           | 9              | 1.441          | 9               | 0.691 | 0.048              | 0.0014   | 0.0001 |
|                 | TcIV            | 14               |                | 1038           | 15             | 6.209          | 5               | 0.758 | 0.084              | 0.0060   | 0.0012 |
|                 | TcV             | 16               |                | 1038           | 17             | 9.067          | 2               | 0.533 | 0.046              | 0.0087   | 0.0008 |
|                 | TcVI            | 16               |                | 1038           | 18             | 9.6            | 2               | 0.533 | 0.046              | 0.0093   | 0.0008 |
| <i>COII-ND1</i> | <i>T. cruzi</i> | 102 <sup>h</sup> | 1117 (1094)    | 195            | 51.788         | 38             | 0.957           | 0.007 | 0.0473             | 0.0023   |        |
|                 | TcI             | 42               | 1114 (1109)    | 112            | 20.129         | 15             | 0.900           | 0.026 | 0.0182             | 0.0045   |        |
|                 | TcII            | 10 <sup>h</sup>  | 1116 (1114)    | 7              | 1.556          | 4              | 0.533           | 0.180 | 0.0014             | 0.0006   |        |
|                 | TcIII           | 18               | 1115 (1100)    | 26             | 6.948          | 9              | 0.856           | 0.062 | 0.0063             | 0.0009   |        |
|                 | TcIV            | 9                | 1114 (1109)    | 45             | 15.444         | 6              | 0.833           | 0.127 | 0.0139             | 0.0037   |        |
|                 | TcV             | 12               | 1114           | 3              | 0.5            | 4              | 0.029           | 0.170 | 0.0005             | 0.0002   |        |
|                 | TcVI            | 11               | 1114           | 1              | 0.182          | 2              | 0.182           | 0.144 | 0.0002             | 0.0001   |        |

<sup>a</sup> Number of sequences; 2 per sample for *GPI* (diploid), 1 per sample for *COII-ND1* (haploid)

<sup>b</sup> Length of sequence (excluding sites with alignment gaps)

<sup>c</sup> Number of variable sites

<sup>d</sup> Mean number of pairwise nucleotide differences

<sup>e</sup> Number of haplotypes

<sup>f</sup> Haplotype diversity

<sup>g</sup> Per site nucleotide diversity

<sup>h</sup> Three samples (haplotype 26) excluded due to large deletion
