# Supplementary material for: Recent, Independent and Anthropogenic Origins of Trypanosoma cruzi Hybrids
Source: PubMed Central journal article supplement (PMC3191134; doi:10.1371/journal.pntd.0001363), 2011-10-11
Supplement: pntd.0001363.s005.pdf [file pntd.0001363.s005.pdf]

**Table S6. Multilocus microsatellite genotypes**

| Group                  | Sample                  | MLG <sup>a</sup> codes (19 locus; 28 locus) | 6529(TCC)      | 6529(TA)jb | 6529(CA)jc | 6529(CA)ja | mcif10 | 6855(TG) | 6855(TTA)(GTT) | 11863(CA)/K368 | 8741(TG) | 8741(TC) | 8741(TA) | 10101(TAA)a | 10101(CA)jb | 10101(TA)/Set0 | 10101(TC) | 10101(CA)jc | 10101(CA)ja | 6789(TA) | 6559(TC) | 10187(TA) | 7093(TA)jc | 7093(TCC) | 7093(TC) | 6925(TG)jb | 6925(CT) | 6925(TG)ja | 11283(TCG) | 11283(TA)ja |     |
|------------------------|-------------------------|---------------------------------------------|----------------|------------|------------|------------|--------|----------|----------------|----------------|----------|----------|----------|-------------|-------------|----------------|-----------|-------------|-------------|----------|----------|-----------|------------|-----------|----------|------------|----------|------------|------------|-------------|-----|
| Core TcII <sup>b</sup> | Rita cl5                | 19/B02; 28/B02                              | 102            | 177        | 120        | 117        | 183    | 102      | 219            | 114            | 134      | 178      | 234      | 121         | 170         | 165            | 108       | 177         | 166         | 153      | 116      | 171       | 182        | 134       | 156      | 113        | 178      | 144        | 132        | 119         |     |
|                        |                         |                                             | 102            | 177        | 126        | 123        | 185    | 115      | 233            | 128            | 138      | 188      | 250      | 124         | 172         | 173            | 108       | 181         | 172         | 153      | 120      | 179       | 188        | 134       | 166      | 113        | 178      | 146        | 132        | 135         |     |
|                        | CBB cl2                 | 19/B03; 28/B03                              | 96             | 171        | 118        | 125        | 185    | 100      | 213            | 120            | 134      | 180      | 226      | 115         | 170         | 147            | 104       | 173         | 174         | 149      | 116      | 175       | 186        | 137       | 156      | 111        | 178      | 146        | 123        | 119         |     |
|                        |                         |                                             | 108            | 177        | 120        | 127        | 185    | 102      | 233            | 132            | 138      | 180      | 246      | 118         | 170         | 173            | 104       | 177         | 174         | 151      | 120      | 183       | 190        | 137       | 166      | 113        | 178      | 146        | 126        | 131         |     |
|                        | Chaco23 col4            | 19/B06; 28/B06                              | 108            | 175        | 121        | 117        | 185    | 102      | 243            | 114            | 130      | 192      | 236      | 121         | 170         | 163            | 106       | 177         | 168         | 151      | 120      | 171       | 192        | 134       | 156      | 111        | 178      | 148        | 126        | 127         |     |
|                        |                         |                                             | 111            | 177        | 121        | 123        | 185    | 102      | 243            | 128            | 130      | 192      | 236      | 121         | 170         | 173            | 108       | 177         | 174         | 151      | 122      | 175       | 192        | 134       | 160      | 113        | 178      | 150        | 126        | 127         |     |
|                        | Pot7b cl5               | 19/B04; 28/B04                              | 102            | 177        | 120        | 117        | 183    | 102      | 219            | 114            | 134      | 178      | 234      | 121         | 170         | 165            | 108       | 177         | 166         | 153      | 116      | 171       | 182        | 134       | 156      | 113        | 178      | 144        | 132        | 119         |     |
|                        |                         |                                             | 117            | 179        | 126        | 123        | 185    | 115      | 233            | 128            | 138      | 188      | 250      | 124         | 172         | 173            | 108       | 181         | 172         | 153      | 120      | 179       | 188        | 134       | 166      | 113        | 178      | 146        | 132        | 135         |     |
|                        | IVV cl4                 | 19/B05; 28/B05                              | 96             | 177        | 118        | 125        | 185    | 100      | 213            | 120            | 130      | 180      | 226      | 115         | 170         | 173            | 104       | 173         | 174         | 149      | 116      | 183       | 186        | 137       | 156      | 111        | 178      | 146        | 123        | 119         |     |
|                        |                         |                                             | 111            | 183        | 120        | 129        | 185    | 100      | 233            | 120            | 138      | 192      | 234      | 118         | 170         | 173            | 104       | 177         | 174         | 149      | 120      | 183       | 194        | 137       | 156      | 115        | 178      | 146        | 126        | 131         |     |
|                        | Esm cl3                 | 19/B04; 28/B04                              | 102            | 177        | 120        | 117        | 183    | 102      | 219            | 114            | 134      | 178      | 234      | 121         | 170         | 165            | 108       | 177         | 166         | 153      | 116      | 171       | 182        | 134       | 156      | 113        | 178      | 144        | 132        | 119         |     |
|                        |                         |                                             | 117            | 179        | 126        | 123        | 185    | 115      | 233            | 128            | 138      | 188      | 250      | 124         | 172         | 173            | 108       | 181         | 172         | 153      | 120      | 179       | 188        | 134       | 166      | 113        | 178      | 146        | 132        | 135         |     |
|                        | Pot7a cl1               | 19/B04; 28/B04                              | 102            | 177        | 120        | 117        | 183    | 102      | 219            | 114            | 134      | 178      | 234      | 121         | 170         | 165            | 108       | 177         | 166         | 153      | 116      | 171       | 182        | 134       | 156      | 113        | 178      | 144        | 132        | 119         |     |
|                        |                         |                                             | 117            | 179        | 126        | 123        | 185    | 115      | 233            | 128            | 138      | 188      | 250      | 124         | 172         | 173            | 108       | 181         | 172         | 153      | 120      | 179       | 188        | 134       | 166      | 113        | 178      | 146        | 132        | 135         |     |
|                        | T665 cl1                | 19/B07; 28/B07                              | 96             | 175        | 120        | 117        | 185    | 102      | 213            | 130            | 128      | 178      | 228      | 118         | 170         | 173            | 104       | 177         | 172         | \        | 116      | 179       | 194        | 134       | 170      | 113        | 178      | 146        | 129        | 119         |     |
|                        |                         |                                             | 96             | 177        | 120        | 127        | 185    | 104      | 233            | 132            | 138      | 180      | 228      | 118         | 172         | 173            | 108       | 187         | 174         | \        | 116      | 179       | 194        | 134       | 170      | 123        | 178      | 146        | 132        | 131         |     |
|                        | Tu18 cl2                | 19/B01; 28/B01                              | 96             | 177        | 118        | 125        | 185    | 100      | 213            | 120            | 130      | 180      | 226      | 115         | 170         | 173            | 104       | 173         | 174         | 149      | 116      | 183       | 186        | 137       | 156      | 111        | 178      | 146        | 123        | 119         |     |
|                        |                         |                                             | 111            | 179        | 120        | 129        | 185    | 100      | 233            | 120            | 138      | 192      | 234      | 118         | 170         | 173            | 104       | 177         | 174         | 149      | 120      | 183       | 194        | 137       | 156      | 115        | 178      | 146        | 126        | 131         |     |
|                        | Core TcIII <sup>b</sup> | ARMA18 cl3                                  | 19/C04; 28/C04 | 105        | 185        | 114        | 117    | 203      | 102            | 254            | 138      | 124      | 180      | 216         | 94          | 172            | 153       | 104         | 177         | 170      | 145      | 116       | 177        | 186       | 125      | 146        | 109      | 174        | 138        | 114         | 125 |
|                        |                         |                                             |                | 105        | 185        | 114        | 117    | 203      | 104            | 254            | 138      | 124      | 182      | 222         | 94          | 172            | 155       | 104         | 177         | 170      | 163      | 122       | 177        | 190       | 125      | 146        | 111      | 176        | 138        | 123         | 125 |
| ARMA13 cl1             |                         | 19/C01; 28/C01                              | 105            | 185        | 114        | 117        | 193    | 98       | 246            | 114            | 124      | 180      | 200      | 94          | 178         | 153            | 100       | 177         | 170         | 141      | 120      | 177       | 188        | 125       | 146      | 109        | 174      | 138        | 114        | 127         |     |
|                        |                         |                                             | 105            | 185        | 114        | 117        | 203    | 98       | 285            | 136            | 130      | 182      | 220      | 94          | 180         | 155            | 104       | 177         | 170         | 145      | 120      | 177       | 194        | 125       | 146      | 111        | 176      | 138        | 114        | 127         |     |
| 85/847 cl2             |                         | 19/C08; 28/C08                              | 105            | 183        | 114        | 117        | 191    | 104      | 254            | 114            | 130      | 174      | 206      | 97          | 176         | 153            | 100       | 177         | 170         | 149      | 116      | 177       | 188        | 125       | 146      | 107        | 176      | 138        | 114        | 123         |     |
|                        |                         |                                             | 105            | 183        | 114        | 117        | 201    | 124      | 257            | 114            | 130      | 174      | 208      | 97          | 178         | 153            | 104       | 177         | 170         | 149      | 126      | 177       | 188        | 125       | 146      | 107        | 176      | 138        | 114        | 131         |     |
| M5631 cl5              |                         | 19/C06; 28/C06                              | 105            | 189        | 114        | 117        | 193    | 118      | 230            | 114            | 128      | 172      | 200      | 99          | 174         | 153            | 100       | 179         | 170         | 135      | 132      | 177       | 208        | 125       | 146      | 109        | 174      | 138        | 117        | 131         |     |
|                        |                         |                                             | 105            | 189        | 114        | 117        | 193    | 118      | 230            | 114            | 128      | 172      | 232      | 99          | 174         | 153            | 100       | 179         | 170         | 137      | 132      | 177       | 214        | 125       | 146      | 109        | 176      | 138        | 117        | 131         |     |
| CM25 cl2               |                         | 19/C05; 28/C05                              | 105            | 177        | 114        | 117        | 197    | 100      | 269            | 126            | 130      | 186      | 228      | 97          | 172         | 153            | 104       | 177         | 168         | 149      | 110      | 175       | 190        | 119       | 146      | 109        | 178      | 138        | 114        | 131         |     |
|                        |                         |                                             | 105            | 201        | 114        | 117        | 197    | 102      | 285            | 126            | 130      | 186      | 228      | 97          | 176         | 155            | 104       | 177         | 170         | 149      | 120      | 175       | 198        | 125       | 146      | 111        | 182      | 138        | 114        | 131         |     |
| JA2 cl2                |                         | 19/C02; 28/C02                              | 105            | 175        | 114        | 117        | 193    | 110      | 240            | 114            | 124      | 174      | 206      | 94          | 174         | 155            | 106       | 177         | 170         | 137      | 118      | 179       | 198        | 119       | 146      | 109        | 174      | 138        | 114        | 121         |     |
|                        |                         |                                             | 105            | 195        | 114        | 117        | 195    | 110      | 269            | 128            | 124      | 176      | 206      | 97          | 174         | 155            | 106       | 177         | 170         | 137      | 122      | 181       | 198        | 125       | 146      | 111        | 176      | 138        | 114        | 133         |     |
| SABP19 cl1             |                         | 19/C03; 28/C03                              | 105            | 185        | 114        | 117        | 193    | 110      | 227            | 116            | 124      | 174      | 208      | 94          | 172         | 153            | 100       | 177         | 170         | 147      | 120      | 177       | 190        | 119       | 146      | 109        | 174      | 138        | 114        | 123         |     |
|                        |                         |                                             | 105            | 189        | 114        | 117        | 193    | 122      | 264            | 130            | 128      | 180      | 212      | 97          | 180         | 155            | 100       | 177         | 170         | 147      | 122      | 177       | 192        | 125       | 146      | 109        | 176      | 138        | 123        | 127         |     |
| M6241 cl6              |                         | 19/C07; 28/C07                              | 105            | 209        | 114        | 117        | 185    | 118      | 269            | 126            | 130      | 176      | 208      | 94          | 174         | 155            | 104       | 177         | 170         | 135      | 108      | 175       | 208        | 119       | 146      | 109        | 174      | 138        | 111        | 121         |     |
|                        |                         |                                             | 105            | 211        | 114        | 117        | 195    | 118      | 272            | 126            | 130      | 176      | 216      | 97          | 174         | 155            | 104       | 177         | 170         | 137      | 122      | 179       | 214        | 125       | 146      | 109        | 176      | 138        | 114        | 125         |     |
| X9/3                   |                         | 19/C09; 28/C09                              | 105            | 185        | 114        | 117        | 193    | 102      | 235            | 130            | 130      | 180      | 200      | 94          | 178         | 153            | 100       | 177         | 170         | 145      | 116      | 177       | 186        | 125       | 146      | 111        | 174      | 138        | 114        | 123         |     |
|                        |                         |                                             | 105            | 185        | 114        | 117        | 203    | 110      | 235            | 130            | 130      | 180      | 216      | 97          | 178         | 153            | 100       | 177         | 170         | 145      | 124      | 177       | 196        | 125       | 146      | 111        | 176      | 138        | 114        | 125         |     |
| X109/2                 |                         | 19/C10; 28/C10                              | 105            | 185        | 114        | 117        | 193    | 110      | 242            | 116            | 124      | 174      | 208      | 97          | 172         | 153            | 100       | 177         | 170         | 147      | 120      | 177       | 190        | 125       | 146      | 109        | 176      | 138        | 114        | 123         |     |
|                        |                         |                                             | 105            | 189        | 114        | 117        | 193    | 122      | 264            | 130            | 128      | 180      | 212      | 97          | 180         | 153            | 100       | 177         | 170         | 147      | 122      | 177       | 192        | 125       | 146      | 109        | 176      | 138        | 123        | 127         |     |

|                         |               |                |     |     |     |     |     |     |     |     |     |     |     |     |     |     |     |     |     |     |     |     |     |     |     |     |     |     |     |     |
|-------------------------|---------------|----------------|-----|-----|-----|-----|-----|-----|-----|-----|-----|-----|-----|-----|-----|-----|-----|-----|-----|-----|-----|-----|-----|-----|-----|-----|-----|-----|-----|-----|
| Core TcV <sup>b</sup>   | PAH179 cl5    | 19/D02; 28/D02 | 105 | 177 | 114 | 117 | 185 | 100 | 227 | 128 | 124 | 180 | 210 | 97  | 170 | 153 | 100 | 177 | 170 | 145 | 120 | 177 | 188 | 125 | 146 | 105 | 178 | 138 | 114 | 125 |
|                         |               |                | 111 | 187 | 120 | 129 | 191 | 104 | 230 | 128 | 130 | 190 | 226 | 115 | 178 | 173 | 104 | 177 | 174 | 145 | 120 | 183 | 190 | 137 | 156 | 111 | 178 | 146 | 123 | 125 |
|                         | Chaco2 cl3    | 19/D01; 28/D01 | 105 | 177 | 114 | 117 | 185 | 100 | 213 | 128 | 124 | 180 | 210 | 97  | 170 | 153 | 100 | 177 | 170 | 145 | 120 | 177 | 188 | 125 | 146 | 105 | 174 | 138 | 114 | 127 |
|                         |               |                | 111 | 187 | 120 | 129 | 191 | 104 | 230 | 128 | 130 | 192 | 226 | 115 | 178 | 173 | 104 | 177 | 174 | 145 | 120 | 183 | 190 | 137 | 156 | 111 | 178 | 146 | 123 | 127 |
|                         | Para6 cl4     | 19/D01; 28/D01 | 105 | 177 | 114 | 117 | 185 | 100 | 213 | 128 | 124 | 180 | 210 | 97  | 170 | 153 | 100 | 177 | 170 | 145 | 120 | 177 | 188 | 125 | 146 | 105 | 174 | 138 | 114 | 127 |
|                         |               |                | 111 | 187 | 120 | 129 | 191 | 104 | 230 | 128 | 130 | 192 | 226 | 115 | 178 | 173 | 104 | 177 | 174 | 145 | 120 | 183 | 190 | 137 | 156 | 111 | 178 | 146 | 123 | 127 |
|                         | Vinch101 cl1  | 19/D01; 28/D01 | 105 | 177 | 114 | 117 | 185 | 100 | 213 | 128 | 124 | 180 | 210 | 97  | 170 | 153 | 100 | 177 | 170 | 145 | 120 | 177 | 188 | 125 | 146 | 105 | 174 | 138 | 114 | 127 |
|                         |               |                | 111 | 187 | 120 | 129 | 191 | 104 | 230 | 128 | 130 | 192 | 226 | 115 | 178 | 173 | 104 | 177 | 174 | 145 | 120 | 183 | 190 | 137 | 156 | 111 | 178 | 146 | 123 | 127 |
|                         | Sc43 cl1      | 19/D01; 28/D01 | 105 | 177 | 114 | 117 | 185 | 100 | 213 | 128 | 124 | 180 | 210 | 97  | 170 | 153 | 100 | 177 | 170 | 145 | 120 | 177 | 188 | 125 | 146 | 105 | 174 | 138 | 114 | 127 |
|                         |               |                | 111 | 187 | 120 | 129 | 191 | 104 | 230 | 128 | 130 | 192 | 226 | 115 | 178 | 173 | 104 | 177 | 174 | 145 | 120 | 183 | 190 | 137 | 156 | 111 | 178 | 146 | 123 | 127 |
|                         | 92-80 cl2     | 19/D01; 28/D01 | 105 | 177 | 114 | 117 | 185 | 100 | 213 | 128 | 124 | 180 | 210 | 97  | 170 | 153 | 100 | 177 | 170 | 145 | 120 | 177 | 188 | 125 | 146 | 105 | 174 | 138 | 114 | 127 |
|                         |               |                | 111 | 187 | 120 | 129 | 191 | 104 | 230 | 128 | 130 | 192 | 226 | 115 | 178 | 173 | 104 | 177 | 174 | 145 | 120 | 183 | 190 | 137 | 156 | 111 | 178 | 146 | 123 | 127 |
|                         | Para4 cl3     | 19/D01; 28/D01 | 105 | 177 | 114 | 117 | 185 | 100 | 213 | 128 | 124 | 180 | 210 | 97  | 170 | 153 | 100 | 177 | 170 | 145 | 120 | 177 | 188 | 125 | 146 | 105 | 174 | 138 | 114 | 127 |
|                         |               |                | 111 | 187 | 120 | 129 | 191 | 104 | 230 | 128 | 130 | 192 | 226 | 115 | 178 | 173 | 104 | 177 | 174 | 145 | 120 | 183 | 190 | 137 | 156 | 111 | 178 | 146 | 123 | 127 |
|                         | Bug2148 cl1   | 19/D01; 28/D01 | 105 | 177 | 114 | 117 | 185 | 100 | 213 | 128 | 124 | 180 | 210 | 97  | 170 | 153 | 100 | 177 | 170 | 145 | 120 | 177 | 188 | 125 | 146 | 105 | 174 | 138 | 114 | 127 |
|                         |               |                | 111 | 187 | 120 | 129 | 191 | 104 | 230 | 128 | 130 | 192 | 226 | 115 | 178 | 173 | 104 | 177 | 174 | 145 | 120 | 183 | 190 | 137 | 156 | 111 | 178 | 146 | 123 | 127 |
| Core TcVI <sup>b</sup>  | Chaco9 col15  | 19/E01; 28/E01 | 105 | 177 | 114 | 117 | 185 | 104 | 213 | 108 | 128 | 180 | 210 | 94  | 170 | 153 | 100 | 177 | 170 | 147 | 120 | 175 | 190 | 140 | 146 | 109 | 174 | 138 | 123 | 125 |
|                         |               |                | 111 | 187 | 120 | 129 | 195 | 122 | 254 | 130 | 136 | 180 | 262 | 115 | 178 | 173 | 106 | 187 | 172 | 147 | 120 | 177 | 190 | 140 | 170 | 117 | 178 | 148 | 138 | 125 |
|                         | P251 cl7      | 19/E03; 28/E03 | 105 | 177 | 114 | 117 | 185 | 104 | 213 | 108 | 128 | 180 | 210 | 94  | 170 | 153 | 100 | 177 | 170 | 147 | 120 | 175 | 190 | 140 | 146 | 109 | 174 | 138 | 123 | 125 |
|                         |               |                | 111 | 187 | 120 | 129 | 195 | 122 | 254 | 130 | 136 | 180 | 258 | 115 | 178 | 173 | 106 | 187 | 172 | 147 | 120 | 177 | 190 | 140 | 170 | 117 | 178 | 148 | 138 | 125 |
|                         | Chaco17 col1  | 19/E01; 28/E01 | 105 | 177 | 114 | 117 | 185 | 104 | 213 | 108 | 128 | 180 | 210 | 94  | 170 | 153 | 100 | 177 | 170 | 147 | 120 | 175 | 190 | 140 | 146 | 109 | 174 | 138 | 123 | 125 |
|                         |               |                | 111 | 187 | 120 | 129 | 195 | 122 | 254 | 130 | 136 | 180 | 262 | 115 | 178 | 173 | 106 | 187 | 172 | 147 | 120 | 177 | 190 | 140 | 170 | 117 | 178 | 148 | 138 | 125 |
|                         | Tula cl2      | 19/E02; 28/E02 | 105 | 177 | 114 | 117 | 185 | 104 | 213 | 108 | 128 | 180 | 210 | 94  | 170 | 153 | 100 | 177 | 170 | 147 | 120 | 175 | 190 | 140 | 146 | 109 | 174 | 138 | 123 | 125 |
|                         |               |                | 111 | 187 | 120 | 129 | 195 | 122 | 254 | 130 | 136 | 180 | 258 | 115 | 178 | 173 | 106 | 187 | 172 | 147 | 120 | 177 | 190 | 140 | 170 | 117 | 178 | 148 | 138 | 125 |
|                         | EPV20-1 cl1   | 19/E02; 28/E02 | 105 | 177 | 114 | 117 | 185 | 104 | 213 | 108 | 128 | 180 | 210 | 94  | 170 | 153 | 100 | 177 | 170 | 147 | 120 | 175 | 190 | 140 | 146 | 109 | 174 | 138 | 123 | 125 |
|                         |               |                | 111 | 187 | 120 | 129 | 195 | 122 | 254 | 130 | 136 | 180 | 258 | 115 | 178 | 173 | 106 | 187 | 172 | 147 | 120 | 177 | 190 | 140 | 170 | 117 | 178 | 148 | 138 | 125 |
|                         | LHVA cl4      | 19/E01; 28/E01 | 105 | 177 | 114 | 117 | 185 | 104 | 213 | 108 | 128 | 180 | 210 | 94  | 170 | 153 | 100 | 177 | 170 | 147 | 120 | 175 | 190 | 140 | 146 | 109 | 174 | 138 | 123 | 125 |
|                         |               |                | 111 | 187 | 120 | 129 | 195 | 122 | 254 | 130 | 136 | 180 | 262 | 115 | 178 | 173 | 106 | 187 | 172 | 147 | 120 | 177 | 190 | 140 | 170 | 117 | 178 | 148 | 138 | 125 |
|                         | CL Brener     | 19/E01; 28/E01 | 105 | 177 | 114 | 117 | 185 | 104 | 213 | 108 | 128 | 180 | 210 | 94  | 170 | 153 | 100 | 177 | 170 | 147 | 120 | 175 | 190 | 140 | 146 | 109 | 174 | 138 | 123 | 125 |
|                         |               |                | 111 | 187 | 120 | 129 | 195 | 122 | 254 | 130 | 136 | 180 | 262 | 115 | 178 | 173 | 106 | 187 | 172 | 147 | 120 | 177 | 190 | 140 | 170 | 117 | 178 | 148 | 138 | 125 |
|                         | VFRA1 cl1     | 19/E01; 28/E01 | 105 | 177 | 114 | 117 | 185 | 104 | 213 | 108 | 128 | 180 | 210 | 94  | 170 | 153 | 100 | 177 | 170 | 147 | 120 | 175 | 190 | 140 | 146 | 109 | 174 | 138 | 123 | 125 |
|                         |               |                | 111 | 187 | 120 | 129 | 195 | 122 | 254 | 130 | 136 | 180 | 262 | 115 | 178 | 173 | 106 | 187 | 172 | 147 | 120 | 177 | 190 | 140 | 170 | 117 | 178 | 148 | 138 | 125 |
| Suppl. TcI <sup>c</sup> | CJ007 (PI)    | 19/X06; ND     | ND  | 167 | ND  | 113 | 187 | ND  | ND  | 116 | ND  | ND  | \   | ND  | \   | 159 | 104 | 179 | 178 | ND  | 110 | 131 | 182 | 128 | 160 | 111 | 172 | 138 | 126 | ND  |
|                         |               |                | ND  | 167 | ND  | 117 | 189 | ND  | ND  | 116 | ND  | ND  | \   | ND  | \   | 163 | 106 | 179 | 186 | ND  | 110 | 131 | 186 | 128 | 160 | 119 | 172 | 142 | 129 | ND  |
|                         | CJ005 (PII)   | 19/X05; ND     | ND  | 167 | ND  | 117 | 183 | ND  | ND  | 116 | ND  | ND  | \   | ND  | \   | 161 | 104 | 179 | 170 | ND  | 110 | 127 | 186 | 128 | 160 | 111 | 170 | 142 | 126 | ND  |
|                         |               |                | ND  | 167 | ND  | 117 | 183 | ND  | ND  | 116 | ND  | ND  | \   | ND  | \   | 163 | 104 | 179 | 176 | ND  | 110 | 131 | 188 | 128 | 160 | 113 | 172 | 144 | 126 | ND  |
|                         | SAXP18 cl1    | 19/X01; ND     | ND  | 167 | ND  | 117 | 191 | ND  | ND  | 116 | ND  | ND  | 190 | ND  | 170 | 159 | 104 | 179 | 172 | ND  | 110 | \   | 190 | 128 | 160 | 111 | 172 | 142 | 129 | ND  |
|                         |               |                | ND  | 167 | ND  | 117 | 191 | ND  | ND  | 116 | ND  | ND  | 190 | ND  | 176 | 159 | 104 | 179 | 172 | ND  | 110 | \   | 190 | 128 | 160 | 111 | 172 | 142 | 129 | ND  |
|                         | Chile C22 cl1 | 19/X02; ND     | ND  | 167 | ND  | 117 | 187 | ND  | ND  | 116 | ND  | ND  | 190 | ND  | 178 | 159 | 104 | 179 | 172 | ND  | 110 | 131 | 190 | 128 | 160 | 111 | 172 | 140 | 129 | ND  |
|                         |               |                | ND  | 167 | ND  | 117 | 191 | ND  | ND  | 116 | ND  | ND  | 190 | ND  | 178 | 159 | 104 | 179 | 172 | ND  | 110 | 131 | 190 | 128 | 160 | 111 | 172 | 140 | 129 | ND  |
|                         | JR cl4        | 19/X04; ND     | ND  | 167 | ND  | 117 | 189 | ND  | ND  | 116 | ND  | ND  | 196 | ND  | 170 | 163 | 104 | \   | 176 | ND  | 110 | 131 | 182 | 128 | 160 | 111 | 172 | 142 | 129 | ND  |
|                         |               |                | ND  | 169 | ND  | 117 | 201 | ND  | ND  | 116 | ND  | ND  | 196 | ND  | 170 | 163 | 104 | \   | 176 | ND  | 110 | 131 | 184 | 128 | 160 | 111 | 172 | 142 | 129 | ND  |
|                         | 92101601P cl1 | 19/X03; ND     | ND  | 167 | ND  | 117 | 187 | ND  | ND  | 116 | ND  | ND  | 196 | ND  | 172 | 159 | 104 | 185 | 170 | ND  | 110 | 131 | 200 | 128 | 160 | 109 | 174 | 140 | 120 | ND  |
|                         |               |                | ND  | 167 | ND  | 117 | 187 | ND  | ND  | 116 | ND  | ND  | 196 | ND  | 176 | 159 | 104 | 185 | 172 | ND  | 110 | 131 | 200 | 128 | 160 | 109 | 174 | 140 | 132 | ND  |
|                         | FLORIDA       | 19/X07; ND     | ND  | 167 | ND  | 117 | 187 | ND  | ND  | 116 | ND  | ND  | \   | ND  | 172 | 159 | 104 | 185 | 170 | ND  | 110 | 131 | 200 | 128 | 160 | 109 | 174 | 140 | 120 | ND  |

|                           |                 |            |    |     |    |     |     |    |    |     |    |    |     |    |     |     |     |     |     |    |     |     |     |     |     |     |     |     |     |    |
|---------------------------|-----------------|------------|----|-----|----|-----|-----|----|----|-----|----|----|-----|----|-----|-----|-----|-----|-----|----|-----|-----|-----|-----|-----|-----|-----|-----|-----|----|
|                           |                 |            | ND | 167 | ND | 117 | 187 | ND | ND | 116 | ND | ND | \   | ND | 172 | 159 | 104 | 185 | 170 | ND | 110 | 131 | 200 | 128 | 160 | 109 | 174 | 140 | 132 | ND |
|                           | M7              | 19/X08; ND | ND | \   | ND | 117 | 187 | ND | ND | 116 | ND | ND | 196 | ND | 172 | 163 | 104 | 185 | 172 | ND | 110 | 131 | 184 | 128 | 160 | 109 | 174 | 138 | 132 | ND |
|                           |                 |            | ND | \   | ND | 117 | 189 | ND | ND | 116 | ND | ND | 196 | ND | 172 | 163 | 104 | 185 | 174 | ND | 110 | 131 | 186 | 128 | 160 | 109 | 174 | 140 | 132 | ND |
|                           | Xe1313 cl2      | 19/X09; ND | ND | 167 | ND | 113 | 187 | ND | ND | 116 | ND | ND | 192 | ND | 176 | 159 | 104 | 179 | 178 | ND | 110 | 131 | 182 | 128 | 160 | 111 | 172 | 138 | 132 | ND |
|                           |                 |            | ND | 167 | ND | 117 | 189 | ND | ND | 116 | ND | ND | 192 | ND | 176 | 159 | 106 | 179 | 186 | ND | 110 | 141 | 186 | 128 | 160 | 119 | 172 | 142 | 132 | ND |
|                           | Xe3981          | 19/X10; ND | ND | 167 | ND | 117 | 187 | ND | ND | 116 | ND | ND | \   | ND | 170 | 163 | 104 | 179 | \   | ND | 110 | 131 | 184 | 128 | 160 | 111 | 170 | 134 | 126 | ND |
|                           |                 |            | ND | 167 | ND | 117 | 187 | ND | ND | 116 | ND | ND | \   | ND | 170 | 163 | 106 | 177 | \   | ND | 110 | 131 | 186 | 128 | 160 | 125 | 172 | 144 | 129 | ND |
|                           | Sjm34 cl1       | 19/X11; ND | ND | 167 | ND | 117 | 187 | ND | ND | 116 | ND | ND | 192 | ND | 182 | 163 | 104 | 179 | 176 | ND | 110 | 131 | 190 | 128 | 160 | 123 | 174 | 140 | 129 | ND |
|                           |                 |            | ND | 167 | ND | 117 | 191 | ND | ND | 116 | ND | ND | 196 | ND | 182 | 163 | 104 | 179 | 184 | ND | 110 | 131 | 192 | 128 | 160 | 123 | 176 | 142 | 129 | ND |
|                           | Xe5012          | 19/X12; ND | ND | 169 | ND | 117 | 187 | ND | ND | 116 | ND | ND | 190 | ND | 172 | 163 | 104 | 177 | 170 | ND | 110 | 131 | 184 | 128 | 160 | 109 | 172 | 142 | 126 | ND |
|                           |                 |            | ND | 169 | ND | 117 | 191 | ND | ND | 116 | ND | ND | 192 | ND | 174 | 165 | 104 | 177 | 176 | ND | 110 | 141 | 188 | 128 | 160 | 111 | 172 | 144 | 129 | ND |
|                           | COTMA9          | 19/X13; ND | ND | 167 | ND | 117 | 191 | ND | ND | 116 | ND | ND | 190 | ND | 170 | 155 | 104 | \   | 172 | ND | 110 | 131 | 190 | 128 | 160 | 107 | 172 | 140 | 129 | ND |
|                           |                 |            | ND | 167 | ND | 117 | 191 | ND | ND | 116 | ND | ND | 198 | ND | 170 | 159 | 104 | \   | 172 | ND | 110 | 131 | 190 | 128 | 160 | 111 | 172 | 142 | 129 | ND |
|                           | PALDA22         | 19/X14; ND | ND | 167 | ND | 117 | 191 | ND | ND | 116 | ND | ND | 196 | ND | 174 | 155 | 104 | 194 | 176 | ND | 110 | 131 | 190 | 128 | 160 | 111 | 172 | 142 | 126 | ND |
|                           |                 |            | ND | 167 | ND | 117 | 191 | ND | ND | 116 | ND | ND | 198 | ND | 174 | 163 | 104 | 194 | 182 | ND | 110 | 131 | 190 | 128 | 160 | 111 | 172 | 142 | 129 | ND |
|                           | COTMA55         | 19/X15; ND | ND | 167 | ND | 117 | 191 | ND | ND | 116 | ND | ND | 190 | ND | 170 | 157 | 104 | 179 | 172 | ND | 110 | 127 | 190 | 128 | 160 | 107 | 172 | 140 | 129 | ND |
|                           |                 |            | ND | 167 | ND | 117 | 191 | ND | ND | 116 | ND | ND | 198 | ND | 170 | 159 | 104 | 179 | 172 | ND | 110 | 131 | 190 | 128 | 160 | 107 | 172 | 140 | 129 | ND |
|                           | 458 cl5         | 19/X16; ND | ND | 167 | ND | 117 | 189 | ND | ND | 116 | ND | ND | 194 | ND | 176 | 157 | 104 | 179 | 170 | ND | 110 | 131 | 188 | 128 | 160 | 111 | 172 | 138 | 126 | ND |
|                           |                 |            | ND | 167 | ND | 117 | 189 | ND | ND | 116 | ND | ND | 194 | ND | 176 | 163 | 104 | 179 | 178 | ND | 110 | 131 | 190 | 128 | 160 | 113 | 172 | 140 | 132 | ND |
|                           | PALDA3          | 19/X17; ND | ND | 167 | ND | 117 | 191 | ND | ND | 116 | ND | ND | 196 | ND | \   | 155 | 104 | 194 | 176 | ND | 110 | 131 | 188 | 128 | 160 | 113 | 170 | 140 | 129 | ND |
|                           |                 |            | ND | 167 | ND | 117 | 191 | ND | ND | 116 | ND | ND | 196 | ND | \   | 163 | 104 | 194 | 182 | ND | 110 | 131 | 188 | 128 | 160 | 113 | 176 | 142 | 129 | ND |
|                           | TEDA            | 19/X18; ND | ND | 167 | ND | 117 | 191 | ND | ND | 116 | ND | ND | 196 | ND | 174 | 155 | 104 | 194 | 176 | ND | 110 | 131 | 190 | 128 | 160 | 111 | 172 | 142 | 126 | ND |
|                           |                 |            | ND | 167 | ND | 117 | 191 | ND | ND | 116 | ND | ND | 198 | ND | 174 | 163 | 104 | 194 | 182 | ND | 110 | 131 | 190 | 128 | 160 | 111 | 176 | 142 | 129 | ND |
|                           | 361ta           | 19/X19; ND | ND | 169 | ND | \   | 189 | ND | ND | 116 | ND | ND | 198 | ND | 172 | 155 | 104 | 185 | 172 | ND | 110 | 131 | 188 | 128 | 160 | 109 | 174 | 140 | 126 | ND |
|                           |                 |            | ND | 169 | ND | \   | 189 | ND | ND | 116 | ND | ND | 198 | ND | 172 | 155 | 104 | 185 | 172 | ND | 110 | 131 | 188 | 128 | 160 | 109 | 174 | 140 | 126 | ND |
|                           | M13 cl3         | 19/X20; ND | ND | 167 | ND | 117 | 187 | ND | ND | 116 | ND | ND | 194 | ND | 172 | 163 | 104 | \   | 166 | ND | 110 | 131 | 182 | 128 | 160 | 109 | 172 | 138 | 126 | ND |
|                           |                 |            | ND | 167 | ND | 117 | 201 | ND | ND | 116 | ND | ND | 198 | ND | 176 | 163 | 104 | \   | 182 | ND | 110 | 131 | 182 | 128 | 160 | 109 | 172 | 140 | 129 | ND |
|                           | M18 cl4         | 19/X21; ND | ND | 167 | ND | 117 | 187 | ND | ND | 116 | ND | ND | 196 | ND | 172 | 163 | 104 | 189 | 166 | ND | 110 | 131 | 182 | 128 | 160 | 109 | 174 | 138 | 129 | ND |
|                           |                 |            | ND | 169 | ND | 117 | 189 | ND | ND | 116 | ND | ND | 198 | ND | 178 | 163 | 106 | 189 | 172 | ND | 110 | 131 | 192 | 128 | 160 | 111 | 174 | 142 | 132 | ND |
|                           | 93070103P       | 19/X07; ND | ND | 167 | ND | 117 | 187 | ND | ND | 116 | ND | ND | 196 | ND | 172 | 159 | 104 | 185 | 170 | ND | 110 | 131 | 200 | 128 | 160 | 109 | 174 | 140 | 120 | ND |
|                           |                 |            | ND | 167 | ND | 117 | 187 | ND | ND | 116 | ND | ND | 196 | ND | 172 | 159 | 104 | 185 | 170 | ND | 110 | 131 | 200 | 128 | 160 | 109 | 174 | 140 | 132 | ND |
|                           | PALDA5          | 19/X23; ND | ND | 167 | ND | 117 | 191 | ND | ND | 116 | ND | ND | 190 | ND | 176 | 155 | 104 | 194 | 182 | ND | 110 | 131 | 190 | 128 | 160 | 111 | 172 | 140 | 126 | ND |
|                           |                 |            | ND | 167 | ND | 117 | 191 | ND | ND | 116 | ND | ND | 198 | ND | 176 | 159 | 104 | 194 | 182 | ND | 110 | 131 | 190 | 128 | 160 | 111 | 172 | 140 | 129 | ND |
|                           | Sjm32           | 19/X24; ND | ND | 167 | ND | 117 | 193 | ND | ND | 116 | ND | ND | 190 | ND | 168 | 159 | 104 | \   | 172 | ND | 110 | 131 | 182 | 128 | 160 | 109 | 172 | 132 | 126 | ND |
|                           |                 |            | ND | 167 | ND | 117 | 195 | ND | ND | 116 | ND | ND | 190 | ND | 168 | 163 | 104 | \   | 172 | ND | 110 | 131 | 186 | 128 | 160 | 109 | 174 | 142 | 126 | ND |
|                           | Sjmc7           | 19/X25; ND | ND | 167 | ND | 117 | 203 | ND | ND | 116 | ND | ND | \   | ND | 168 | 159 | 104 | 177 | 172 | ND | 110 | 131 | 188 | 128 | 160 | 109 | 172 | 132 | 126 | ND |
|                           |                 |            | ND | 167 | ND | 117 | 203 | ND | ND | 116 | ND | ND | \   | ND | 168 | 159 | 104 | 185 | 172 | ND | 110 | 131 | 190 | 128 | 160 | 109 | 172 | 140 | 126 | ND |
|                           | Xe5165          | 19/X26; ND | ND | 167 | ND | 117 | 187 | ND | ND | 116 | ND | ND | 194 | ND | 170 | 159 | 104 | 183 | 178 | ND | 110 | 131 | 182 | 128 | 160 | 111 | 172 | 140 | 132 | ND |
|                           |                 |            | ND | 167 | ND | 117 | 195 | ND | ND | 116 | ND | ND | 194 | ND | 180 | 159 | 104 | 183 | 178 | ND | 110 | 131 | 188 | 128 | 160 | 115 | 172 | 142 | 132 | ND |
|                           | USA Opossum cl2 | 19/X27; ND | ND | 167 | ND | 117 | 187 | ND | ND | 116 | ND | ND | 196 | ND | 172 | 159 | 104 | 185 | 170 | ND | 110 | 131 | 184 | 128 | 160 | 109 | 174 | 140 | 132 | ND |
|                           |                 |            | ND | 167 | ND | 117 | 187 | ND | ND | 116 | ND | ND | 196 | ND | 172 | 159 | 104 | 185 | 170 | ND | 110 | 131 | 202 | 128 | 160 | 109 | 174 | 140 | 132 | ND |
|                           | USA Arma cl1    | 19/X22; ND | ND | 167 | ND | 117 | 187 | ND | ND | 116 | ND | ND | 196 | ND | 172 | 159 | 104 | 185 | 170 | ND | 110 | 131 | 184 | 128 | 160 | 109 | 174 | 140 | 132 | ND |
|                           |                 |            | ND | 167 | ND | 117 | 187 | ND | ND | 116 | ND | ND | 196 | ND | 174 | 159 | 104 | 185 | 170 | ND | 110 | 131 | 184 | 128 | 160 | 109 | 174 | 140 | 132 | ND |
| Suppl. TcIII <sup>d</sup> | CM17            | 19/C11; ND | ND | 169 | ND | 117 | 185 | ND | ND | 114 | ND | ND | 204 | ND | 174 | 155 | 106 | 177 | 170 | ND | 108 | 179 | 198 | 125 | 146 | 109 | 176 | 138 | 114 | ND |
|                           |                 |            | ND | 169 | ND | 117 | 195 | ND | ND | 126 | ND | ND | 210 | ND | 174 | 155 | 106 | 177 | 170 | ND | 114 | 179 | 212 | 125 | 146 | 109 | 176 | 138 | 114 | ND |
|                           | m10             | 19/C12; ND | ND | 187 | ND | 117 | 195 | ND | ND | 114 | ND | ND | 206 | ND | 174 | 151 | 104 | 177 | 170 | ND | 118 | 181 | 196 | 125 | 146 | 109 | 176 | 138 | 114 | ND |

|             |            |            |     |     |     |     |     |    |     |     |    |     |     |     |     |     |     |     |     |     |     |     |     |     |     |     |     |     |     |    |
|-------------|------------|------------|-----|-----|-----|-----|-----|----|-----|-----|----|-----|-----|-----|-----|-----|-----|-----|-----|-----|-----|-----|-----|-----|-----|-----|-----|-----|-----|----|
|             |            | ND         | 187 | ND  | 117 | 197 | ND  | ND | 130 | ND  | ND | 210 | ND  | 176 | 155 | 106 | 177 | 170 | ND  | 120 | 183 | 212 | 125 | 146 | 109 | 178 | 138 | 114 | ND  |    |
|             | cayma19    | 19/C13; ND | ND  | 187 | ND  | 117 | 203 | ND | ND  | 136 | ND | ND  | 206 | ND  | 178 | 153 | 104 | 177 | 170 | ND  | 120 | 177 | 186 | 125 | 146 | 107 | 176 | 138 | 114 | ND |
|             |            |            | ND  | 187 | ND  | 117 | 205 | ND | ND  | 138 | ND | ND  | 212 | ND  | 178 | 153 | 104 | 177 | 170 | ND  | 120 | 177 | 192 | 125 | 146 | 109 | 176 | 138 | 114 | ND |
|             | Ma194      | 19/C14; ND | ND  | 185 | ND  | 117 | 195 | ND | ND  | 130 | ND | ND  | \   | ND  | 176 | 153 | 100 | 177 | 168 | ND  | 108 | 177 | 188 | 125 | 146 | 109 | 174 | 138 | 114 | ND |
|             |            |            | ND  | 189 | ND  | 117 | 195 | ND | ND  | 130 | ND | ND  | \   | ND  | 178 | 153 | 100 | 177 | 168 | ND  | 124 | 177 | 190 | 125 | 146 | 109 | 176 | 138 | 114 | ND |
|             | Sp4        | 19/C15; ND | ND  | 185 | ND  | 117 | 193 | ND | ND  | 130 | ND | ND  | 200 | ND  | 172 | 153 | 100 | 177 | 170 | ND  | 108 | 177 | 188 | 125 | 146 | 111 | 174 | 138 | 114 | ND |
|             |            |            | ND  | 189 | ND  | 117 | 195 | ND | ND  | 138 | ND | ND  | 200 | ND  | 176 | 153 | 100 | 177 | 170 | ND  | 116 | 177 | 192 | 125 | 146 | 111 | 174 | 138 | 123 | ND |
|             | Sjmc4      | 19/C16; ND | ND  | 187 | ND  | 117 | 203 | ND | ND  | 130 | ND | ND  | \   | ND  | 178 | 153 | 104 | 177 | 170 | ND  | 122 | 177 | 188 | 125 | 146 | 107 | 174 | 138 | 114 | ND |
|             |            |            | ND  | 189 | ND  | 117 | 203 | ND | ND  | 134 | ND | ND  | \   | ND  | 180 | 153 | 104 | 177 | 170 | ND  | 122 | 177 | 188 | 125 | 146 | 113 | 176 | 138 | 114 | ND |
|             | Sjmc10     | 19/C17; ND | ND  | 185 | ND  | 117 | 201 | ND | ND  | 112 | ND | ND  | \   | ND  | 172 | 153 | 104 | 177 | 170 | ND  | 122 | 177 | 188 | 125 | 146 | 113 | 174 | 138 | 114 | ND |
|             |            |            | ND  | 185 | ND  | 117 | 203 | ND | ND  | 122 | ND | ND  | \   | ND  | 176 | 155 | 104 | 177 | 170 | ND  | 124 | 177 | 188 | 125 | 146 | 113 | 174 | 138 | 114 | ND |
|             | Sam6       | 19/C18; ND | ND  | 187 | ND  | 117 | 193 | ND | ND  | 130 | ND | ND  | 210 | ND  | 164 | 153 | 104 | 177 | 170 | ND  | 108 | 177 | 192 | 125 | 146 | 105 | 174 | 138 | 114 | ND |
|             |            |            | ND  | 187 | ND  | 117 | 203 | ND | ND  | 142 | ND | ND  | 212 | ND  | 172 | 155 | 104 | 177 | 170 | ND  | 108 | 177 | 192 | 125 | 146 | 109 | 174 | 138 | 123 | ND |
|             | cayma14    | 19/C19; ND | ND  | 185 | ND  | 117 | 195 | ND | ND  | 112 | ND | ND  | \   | ND  | 172 | 155 | 104 | 177 | 170 | ND  | 108 | 177 | 186 | 125 | 146 | 105 | \   | 138 | 114 | ND |
|             |            |            | ND  | 187 | ND  | 117 | 209 | ND | ND  | 130 | ND | ND  | \   | ND  | 178 | 155 | 104 | 177 | 170 | ND  | 120 | 177 | 192 | 125 | 146 | 109 | \   | 138 | 114 | ND |
|             | Arma12     | 19/C20; ND | ND  | 185 | ND  | 117 | 193 | ND | ND  | 134 | ND | ND  | 214 | ND  | 172 | 153 | 100 | 177 | 170 | ND  | 108 | 177 | 194 | 125 | 146 | 105 | 174 | 124 | 114 | ND |
|             |            |            | ND  | 187 | ND  | 117 | 203 | ND | ND  | 136 | ND | ND  | 218 | ND  | 176 | 155 | 104 | 177 | 170 | ND  | 122 | 177 | 200 | 125 | 146 | 109 | 174 | 138 | 114 | ND |
|             | Arma9      | 19/C21; ND | ND  | 185 | ND  | 117 | 195 | ND | ND  | 130 | ND | ND  | 206 | ND  | \   | 153 | 100 | 177 | 170 | ND  | 122 | 177 | 186 | 125 | 146 | 109 | 174 | 138 | 114 | ND |
|             |            |            | ND  | 187 | ND  | 117 | 195 | ND | ND  | 132 | ND | ND  | 210 | ND  | \   | 157 | 100 | 177 | 170 | ND  | 122 | 177 | 192 | 125 | 146 | 109 | 174 | 138 | 123 | ND |
|             | Cayma18    | 19/C22; ND | ND  | 187 | ND  | 117 | \   | ND | ND  | 114 | ND | ND  | 204 | ND  | \   | 155 | 104 | 177 | 170 | ND  | 120 | 177 | 194 | 125 | 146 | 107 | 176 | 138 | 114 | ND |
|             |            |            | ND  | 187 | ND  | 117 | \   | ND | ND  | 114 | ND | ND  | 210 | ND  | \   | 155 | 104 | 177 | 170 | ND  | 122 | 179 | 194 | 125 | 146 | 107 | 176 | 138 | 123 | ND |
|             | Sp13       | 19/C23; ND | ND  | 185 | ND  | 117 | 193 | ND | ND  | 130 | ND | ND  | 200 | ND  | 172 | 153 | 100 | 177 | 170 | ND  | 118 | 177 | 190 | 125 | 146 | 109 | 174 | 138 | 114 | ND |
|             |            |            | ND  | 189 | ND  | 117 | 195 | ND | ND  | 130 | ND | ND  | 206 | ND  | 178 | 153 | 100 | 177 | 170 | ND  | 124 | 179 | 194 | 125 | 146 | 111 | 176 | 138 | 114 | ND |
|             | Sp15       | 19/C24; ND | ND  | 185 | ND  | 117 | 193 | ND | ND  | 130 | ND | ND  | 200 | ND  | 172 | 153 | 100 | 177 | 170 | ND  | 118 | 177 | 190 | 125 | 146 | 109 | 174 | 138 | 114 | ND |
|             |            |            | ND  | 185 | ND  | 117 | 195 | ND | ND  | 130 | ND | ND  | 206 | ND  | 178 | 153 | 100 | 177 | 170 | ND  | 124 | 179 | 194 | 125 | 146 | 111 | 176 | 138 | 114 | ND |
|             | Sp16       | 19/C23; ND | ND  | 185 | ND  | 117 | 193 | ND | ND  | 130 | ND | ND  | 200 | ND  | 172 | 153 | 100 | 177 | 170 | ND  | 118 | 177 | 190 | 125 | 146 | 109 | 174 | 138 | 114 | ND |
|             |            |            | ND  | 189 | ND  | 117 | 195 | ND | ND  | 130 | ND | ND  | 206 | ND  | 178 | 153 | 100 | 177 | 170 | ND  | 124 | 179 | 194 | 125 | 146 | 111 | 176 | 138 | 114 | ND |
| Suppl. TclV | 10R26      | 19/A02; ND | ND  | 173 | ND  | 125 | 185 | ND | ND  | 110 | ND | ND  | 222 | ND  | 172 | 153 | 104 | 189 | 180 | ND  | 112 | 155 | 190 | 125 | 148 | \   | 174 | 152 | 132 | ND |
|             |            |            | ND  | 177 | ND  | 133 | 185 | ND | ND  | 114 | ND | ND  | 224 | ND  | 172 | 153 | 104 | 189 | 180 | ND  | 112 | 155 | 190 | 128 | 148 | \   | 174 | 154 | 132 | ND |
|             | ERA cl2    | 19/A03; ND | ND  | 179 | ND  | 123 | 187 | ND | ND  | 114 | ND | ND  | 198 | ND  | 170 | 153 | 104 | 187 | 180 | ND  | 106 | 163 | \   | 128 | 148 | 107 | 180 | 152 | 132 | ND |
|             |            |            | ND  | 179 | ND  | 123 | 187 | ND | ND  | 114 | ND | ND  | 198 | ND  | 170 | 153 | 104 | 187 | 180 | ND  | 112 | 169 | \   | 128 | 148 | 107 | 180 | 152 | 132 | ND |
|             | CanIII cl1 | 19/A01; ND | ND  | 173 | ND  | 123 | 191 | ND | ND  | 114 | ND | ND  | 196 | ND  | 170 | 155 | 106 | 183 | 178 | ND  | 106 | 167 | \   | 131 | 162 | 109 | 174 | 144 | 132 | ND |
|             |            |            | ND  | 173 | ND  | 123 | 191 | ND | ND  | 114 | ND | ND  | 196 | ND  | 170 | 155 | 106 | 185 | 178 | ND  | 112 | 167 | \   | 131 | 162 | 109 | 174 | 144 | 132 | ND |

ND Not determined

\ Missing data (no amplification or ambiguous profile)

<sup>a</sup> Multilocus genotype

<sup>b</sup> Data for 8 loci (MCLF10, 10101(TA), 6925(TG)a, 11283(TCG), 7093(TC), 10101(TC), 6925(CT), 7093(TCC)) previously published [1]

<sup>c</sup> Data previously published [2]

<sup>d</sup> Data previously published [3]

1. Lewis MD, Llewellyn MS, Gaunt MW, Yeo M, Carrasco HJ, et al. (2009) Flow cytometric analysis and microsatellite genotyping reveal extensive DNA content variation in *Trypanosoma cruzi* populations and expose contrasts between natural and experimental hybrids. *Int J Parasitol* 39: 1305-1317.
2. Llewellyn MS, Miles MA, Carrasco HJ, Lewis MD, Yeo M, et al. (2009) Genome-scale multilocus microsatellite typing of *Trypanosoma cruzi* discrete typing unit I reveals phylogeographic structure and specific genotypes linked to human infection. *PLoS Pathog* 5: e1000410.
3. Llewellyn MS, Lewis MD, Acosta N, Yeo M, Carrasco HJ, et al. (2009) *Trypanosoma cruzi* IIc: Phylogenetic and Phylogeographic Insights from Sequence and Microsatellite Analysis and Potential Impact on Emergent Chagas Disease. *PLoS Negl Trop Dis* 3: e510.
