# Supplementary material for: Recent, Independent and Anthropogenic Origins of Trypanosoma cruzi Hybrids
Source: PLoS Negl Trop Dis. 2011 Oct 11;5(10):e1363. doi: 10.1371/journal.pntd.0001363 (PMC3191134; doi:10.1371/journal.pntd.0001363)
Supplement: Table S2 — Microsatellite locus information. (PDF) [file pntd.0001363.s003.pdf]

**Table S2. Microsatellite locus information**

| Locus                       | Reference chromosome <sup>a</sup> | Repeat type     | Physical position (kb) <sup>a</sup> | Primer 1 (5'-3')       | Primer 2 (5'-3')     |
|-----------------------------|-----------------------------------|-----------------|-------------------------------------|------------------------|----------------------|
| 6529(TCC)                   | 6-S                               | (TCC)n          | 29916.429                           | ATTCTTGTCTGGTGAACACC   | GCCCTCCGTTTATTCTCTC  |
| 6529(TA)b                   | 6-S                               | (TA)n           | 29916.841                           | TGAAGGAGATTCTCTGCGGT   | CTCTCATCTTTTGTGTGTCG |
| 6529(CA)c                   | 6-S                               | (CA)n           | 29920.007                           | GCCTCTATGTCTGTGCCAT    | CGTCTTTTCTCGGGTGTTTC |
| 6529(CA)a                   | 6-S                               | (CA)n           | 29933.413                           | TGTGAAATGATTGACCCGA    | AGAGTCACGCCGCAAAGTAT |
| MCLF10 <sup>b</sup>         | 6-S                               | (CA)n           | 30127.119                           | GCGTAGCGATTCAATTC      | ATCCGCTACCACTATCCAC  |
| 6855(TG)                    | 10-P                              | (TG)n           | 404.483                             | TTGCGTGGTTGTTGTGC      | GAGAAGAGGGGGAGGAAGAA |
| 6855(TTA)(GTT)              | 10-P                              | (TTA)n...(GTT)n | 407.438                             | GAGGTGATGACGATAAAATTGG | GTCTTCCGCATATCCGAGA  |
| 11863(CA)/K368 <sup>c</sup> | 15-P                              | (CA)n           | 2856.622                            | AGTTGACATCCCAAGCAAG    | CCCTGATGCTGCAGACTCTT |
| 8741(TG)                    | 24-P                              | (CT)n...(TG)n   | 8873.863                            | AGAAGAGAGTCCGGAGTTTC   | TGTGCGCCAAGAGTTCTAAA |
| 8741(TC)                    | 24-P                              | (TC)n           | 8903.919                            | GCCATGTTTCCTTACCAAC    | AGGTGTTCCCTCTTTGGAT  |
| 8741(TA)                    | 24-P                              | (TA)n           | 8920.522                            | TGTAACGGTAGGTCTCAATTCG | TTGCACTTGTGTATCTCGCC |
| 10101(TAA)a                 | 27-S                              | (TAA)n          | 10949.242                           | CCGCGGTAGAAGAACCATAA   | TGCGTATTACGACGAGAAG  |
| 10101(CA)b                  | 27-S                              | (CA)n           | 10963.959                           | ACCCAGAGGGGAGAAAAAGA   | TTTACGGTTGGTTCGTGTGA |
| 10101(TA)/Set0 <sup>b</sup> | 27-S                              | (TA)n           | 10995.038                           | CCTCTGCGCACACATTCATT   | CCGTTCTTCATCACCATCCT |
| 10101(TC)                   | 27-S                              | (TC)n           | 10997.7                             | CGTACGACGTGGACACAAAC   | ACAAGTGGGTGAGCCAAAAG |
| 10101(CA)c                  | 27-S                              | (CA)n           | 11035.78                            | GTGTCGTTGCTCCCAAACTC   | AAACTTGCCAAATGTGAGGG |
| 10101(CA)a                  | 27-S                              | (CA)n           | 11036.757                           | GTCGCCATCATGTACAAACG   | CTGTTGCGAATGGTCATAA  |
| 6789(TA)                    | 28-P                              | (TA)n           | 11833.37                            | GACATGGAAAAAGGTAAGTGC  | GAGGACGTCATGATGATTGG |
| 6559(TC)                    | 34-P                              | (TC)n           | 17976.143                           | CGCTCTCAAAGGCACCTTAC   | ATATGGACGCGTAGGAGTGC |
| 10187(TA)                   | 37-P                              | (TA)n           | 21897.051                           | AGAAAAAGGTTTACAACGAGCG | CGATGGAGAACGTGAAACAA |
| 7093(TA)c                   | 39-S                              | (TA)n           | 23338.719                           | CGTGTGCACAGGAGAGAAAA   | CGTTTGGAGGAGGATTGAGA |
| 7093(TCC)                   | 39-S                              | (TCC)n          | 23348.315                           | AGACGTTCAATTCGCAGCC    | AGCCACATCCACATTTCTC  |
| 7093(TC)                    | 39-S                              | (TC)n           | 23392.52                            | CCAACATTCAACAAGGGAAA   | GCATGAATATTGCCGATCT  |
| 6925(TG)b                   | 39-S                              | (TG)n           | 23460.356                           | GAAACGCACTACCCACAC     | GGTAGCAACGCCAAACTTTC |
| 6925(CT)                    | 39-S                              | (CT)n           | 23501.037                           | CATCAAGGAAAAACGGAGGA   | CGGTACCACCTCAAGGAAAG |
| 6925(TG)a                   | 39-S                              | (TG)n           | 23531.787                           | TCGTTCTTTACGCTTGCA     | TAGCAGCAACCAACAAACG  |
| 11283(TCG)                  | 40-P                              | (TCG)n          | 26042.76                            | ACCACCAGGAGGACATGAAG   | TGTACACGGAACAGCGAAG  |
| 11283(TA)a                  | 40-P                              | (TA)n           | 26114.044                           | CCAGTATTCTCCCCCTAA     | CGTCTTGTGATTCCCTT    |

<sup>a</sup> Based on *T. cruzi* CL Brener genome v.2009-09-10 hosted on <http://tritryp.org>

<sup>b</sup> Previously described [1]

<sup>c</sup> Previously described [2]

1. Oliveira RP, Broude NE, Macedo AM, Cantor CR, Smith CL, et al. (1998) Probing the genetic population structure of *Trypanosoma cruzi* with polymorphic microsatellites. Proc Natl Acad Sci USA 95: 3776-3780.

2. Gaunt MW, Yeo M, Frame IA, Stothard JR, Carrasco HJ, et al. (2003) Mechanism of genetic exchange in American trypanosomes. Nature 421: 936-939.
